1 **RUNNING TITLE:** Scaling photosynthesis from gene to leaf

2

3 **TITLE:** Combining gene network, metabolic, and leaf-level models show means to future-  
4 proof soybean photosynthesis under rising CO<sub>2</sub>.

5

6 **Kavya Kannan**<sup>1\*</sup>, **Yu Wang**<sup>2\*</sup>, **Meagan Lang**<sup>3</sup>, **Ghana S. Challa**<sup>4</sup>, **Stephen P. Long**<sup>1,2,3,4,5,6</sup>,  
7 **Amy Marshall-Colon**<sup>1,2,3,4</sup>

8

9 <sup>1</sup>Department of Plant Biology, University of Illinois Urbana Champaign, USA

10 <sup>2</sup>The Carl R. Woese Institute for Genomic Biology, University of Illinois Urbana-Champaign,  
11 USA

12 <sup>3</sup>National Center for Supercomputing Applications at the University of Illinois Urbana-  
13 Champaign, USA

14 <sup>4</sup>Institute for Sustainability, Energy, and Environment, University of Illinois Urbana-Champaign,  
15 USA

16 <sup>5</sup>Department of Crop Sciences, University of Illinois Urbana Champaign, USA

17 <sup>6</sup>Lancaster Environment Centre, Lancaster University, Lancaster University, Lancaster, LA1  
18 4YQ, UK

19

20 \*These authors contributed equally to this work.

21

## 22 **ABSTRACT**

23 Global population increase coupled with rising urbanization underlies the predicted need for  
24 60% more food by 2050, but produced on the same amount of land as today. Improving  
25 photosynthetic efficiency is a largely untapped approach to addressing this problem. Here, we  
26 scale modeling processes from gene expression through photosynthetic metabolism to predict  
27 leaf physiology in evaluating acclimation of photosynthesis to rising [CO<sub>2</sub>]. Model integration  
28 with the yggdrasil interface enabled asynchronous message passing between models. The  
29 multiscale model of soybean photosynthesis calibrated to physiological measures at ambient  
30 [CO<sub>2</sub>] successfully predicted the acclimatory changes in the photosynthetic apparatus that  
31 were observed at 550 ppm [CO<sub>2</sub>] in the field. We hypothesized that genetic alteration is

32 necessary to achieve optimal photosynthetic efficiency under global change. Flux control  
33 analysis in the metabolic system under elevated  $[\text{CO}_2]$  identified enzymes requiring the  
34 greatest change to adapt optimally to the new conditions. This predicted that Rubisco was less  
35 limiting under elevated  $[\text{CO}_2]$  and should be down-regulated allowing re-allocation of  
36 resource to enzymes controlling the rate of regeneration of ribulose-1:5 bisphosphate (RubP).  
37 By linking the GRN through protein concentration to the metabolic model it was possible to  
38 identify transcription factors (TF) that matched the up- and down-regulation of genes needed  
39 to improve photosynthesis. Most striking was TF GmGATA2, which down-regulated genes  
40 for Rubisco synthesis while up-regulating key genes controlling RubP regeneration and starch  
41 synthesis. The changes predicted for this TF most closely matched the physiological ideotype  
42 that the modeling predicted as optimal for the future elevated  $[\text{CO}_2]$  world.

43

44 **KEYWORDS:** Gene network model, metabolic model, photosynthesis, global change, Soybean,  
45 transcription factors, multiscale modeling, model integration

## 46 INTRODUCTION

47 As the world's most important seed legume and most widely grown dicotyledonous crop,  
48 the future-proofing of photosynthesis in soybean (*Glycine max* (L.) Merr.) under rising  
49 atmospheric concentrations of CO<sub>2</sub> ([CO<sub>2</sub>]) is of importance. Down-regulation of light-saturated  
50 net leaf CO<sub>2</sub> uptake ( $A_{sat}$ ) at elevated [CO<sub>2</sub>] has been reported for many C<sub>3</sub> crops, yet the  
51 mechanism underlying this response is poorly understood. Under current [CO<sub>2</sub>],  $A_{sat}$  in C<sub>3</sub> crops  
52 is most commonly limited by the *in vivo* Rubisco activity ( $V_{c,max}$ ) (Long et al., 2004). However,  
53 as [CO<sub>2</sub>] continues to rise, it follows from the steady-state biochemical model of photosynthesis  
54 of (Farquhar et al., 1980) and its subsequent modifications (Von Caemmerer, 2000) that control  
55 will shift from Rubisco to RubP regeneration (Long et al., 2004), which is represented by the  
56 maximum *in vivo* rate of whole chain electron transport ( $J_{max}$ ). While described by electron  
57 transport, most evidence now points to this being limited by the metabolic steps of carbon  
58 metabolism leading to RubP regeneration (Raines, 2003, Stitt and Sonnewald, 1995). This shift  
59 from Rubisco- to RubP- limited photosynthesis permits a reduction in leaf Rubisco content  
60 without a loss in  $A_{sat}$  (Woodrow, 1994, Long et al., 2004, Ainsworth and Long, 2005). Because  
61 Rubisco accounts for the largest single share of leaf N, optimization of Rubisco content would  
62 maximize the efficiency of use of this commonly limiting resource (Drake et al., 1997, Long et  
63 al., 2004).

64 When [CO<sub>2</sub>] is increased around a photosynthesizing leaf,  $A_{sat}$  can increase for two  
65 reasons, first the  $K_M$  of Rubisco for CO<sub>2</sub> is close to the current atmospheric concentration, so  
66 elevated [CO<sub>2</sub>] increases the velocity of carboxylation, and secondly, CO<sub>2</sub> competitively inhibits  
67 the oxygenation reaction that produces phospho-glycolate and in turn photorespiration. This  
68 latter effect is particularly important because it increases the efficiency of net CO<sub>2</sub> uptake by  
69 diverting ATP and NADPH (generated by the light reactions) away from photorespiratory  
70 metabolism to photosynthetic assimilation, and so will increase  $A_{sat}$  regardless of other limiting  
71 factors. Under rising [CO<sub>2</sub>] both factors will increase  $A_{sat}$  when  $V_{c,max}$  is limiting, but only the  
72 second factor when  $J_{max}$  is limiting. Assuming the average specificity and  $K_M$  for CO<sub>2</sub> and O<sub>2</sub>  
73 for Rubisco from terrestrial plants, and a constant intercellular versus external [CO<sub>2</sub>], one can  
74 calculate the increase in  $A_{sat}$  that would result from an increase in atmospheric [CO<sub>2</sub>]. Following  
75 the procedure of (Long et al., 2004) for a leaf temperature of 25 °C, the increase in atmospheric  
76 [CO<sub>2</sub>] from today's 400  $\mu\text{mol mol}^{-1}$  to 550  $\mu\text{mol mol}^{-1}$  would increase Rubisco-limited and

77 RubP-limited photosynthesis by 31% and 9%, respectively.  $550 \mu\text{mol mol}^{-1}$  is the concentration  
78 forecast for 2050 assuming current emissions trends continue (RCP8.5, (Pachauri et al., 2014)).  
79 At current atmospheric  $[\text{CO}_2]$  soybean leaf photosynthesis is at the transition point between  
80  $V_{c,\text{max}}$ - and  $J_{\text{max}}$ -limitation (Bernacchi et al., 2005). Therefore, as  $[\text{CO}_2]$  rises soybean  
81 photosynthesis would become RubP-limited. If however, resource currently invested in Rubisco  
82 was re-allocated to increased  $J_{\text{max}}$  then this transition point would move to a higher  $[\text{CO}_2]$  and a  
83 31% rather than 9% increase in  $A_{\text{sat}}$  could be obtained, without any increased total investment of  
84 protein in the photosynthetic apparatus. When grown under elevated  $[\text{CO}_2]$  in open-air field  
85 conditions, is an increase in  $J_{\text{max}}$  observed at the expense of  $V_{c,\text{max}}$ ?

86 In two consecutive years, (Bernacchi et al., 2005) analyzed photosynthesis in a modern  
87 highly productive soybean cultivar under open-air  $[\text{CO}_2]$  elevation using Free-Air Concentration  
88 Enrichment (FACE) (Long et al., 2006). Compared to control plants those grown in  $[\text{CO}_2]$   
89 elevated to  $550 \mu\text{mol mol}^{-1}$  showed a shift in control of  $A_{\text{sat}}$  from co-limitation of  $V_{c,\text{max}}$  and  $J_{\text{max}}$   
90 to limitation solely by RubP-limitation. There was a significant 5% decrease in the ratio of  
91  $V_{c,\text{max}}:J_{\text{max}}$ , showing a decline in Rubisco activity relative to the capacity for RubP regeneration  
92 (Bernacchi et al., 2005). However, while acclimation had occurred it was insufficient to  
93 maximize the potential increase in  $A_{\text{sat}}$ , had the system responded to fully re-optimize investment  
94 of resources. At  $25^\circ\text{C}$ , re-optimizing the system to 550 ppm was calculated to require a 35%  
95 reduction of investment in Rubisco and re-allocation of that protein to the apparatus for  
96 regeneration of RubP (Drake et al., 1997, Long et al., 2004), while only a 5% change was  
97 observed. The plant was apparently over-investing in Rubisco and under-investing in the  
98 apparatus determining regeneration of RubP. How might genetic manipulation be used to  
99 achieve re-optimization and prepare soybean and other crops to sustainably maximize  
100 photosynthetic efficiency and in turn crop productivity under future conditions?

101 Here we combine a metabolic model of  $\text{C}_3$  photosynthetic metabolism, including the  $\text{C}_2$   
102 photorespiratory pathway, mathematically representing all discrete steps of photosynthesis from  
103 light and  $\text{CO}_2$  absorption to starch and sucrose synthesis (Zhu et al., 2007, Zhu et al., 2013) with  
104 a gene network model to predict observed acclimatory changes. This is successfully tested  
105 against observed acclimatory changes of photosynthesis in soybean grown at elevated  $[\text{CO}_2]$ .  
106 Finally, via sensitivity analysis and dynamic gene regulatory network analysis, the combined

107 model is used to predict genetic changes, including expression levels of transcription factors, that  
108 could fully optimize leaf photosynthetic efficiency to future elevated [CO<sub>2</sub>] conditions.

109

## 110 **MULTISCALE MODEL DEVELOPMENT**

111 To predict what genes may transcriptionally regulate the soybean response to elevated  
112 [CO<sub>2</sub>], it was necessary to develop a mechanistically informed model in which the multi-scale  
113 response could be explored. We have previously developed complete mechanistic metabolic  
114 models of photosynthetic carbon metabolism that successfully predict dynamic responses of leaf  
115 chlorophyll fluorescence and fluxes of CO<sub>2</sub> and O<sub>2</sub> to changes in light, [CO<sub>2</sub>] and [O<sub>2</sub>] (Zhu et  
116 al., 2007, Zhu et al., 2013). While each of these models provided new insights about  
117 photosynthesis, when combined with optimization routines to predict optimal investments for  
118 different environments, they are not equipped to predict transcriptomic and genetic changes that  
119 could achieve those optimal patterns of investment. The generalization of whole plant  
120 metabolism and signaling pathways often results in simulations with low prediction accuracy  
121 upon model perturbation. Multiscale models that mimic the biological flow of information across  
122 scales have been shown to have higher prediction accuracy than models at individual scales,  
123 especially when simulating conditions different from the original training data (Chew et al.,  
124 2014). To our knowledge, no current model of photosynthesis in soybean scales from genes to  
125 organs. Such a model could potentially simulate system-wide changes in photosynthesis in  
126 response to targeted genetic perturbations.

127 To predict leaf-level responses of net CO<sub>2</sub> uptake, a metabolic model (e-Photosynthesis)  
128 was combined with a leaf micrometeorological model that integrated boundary layer  
129 conductance, stomatal conductance, and leaf energy balance (Drewry et al., 2010, Nikolov et al.,  
130 1995). Our prior e-Photosynthesis model (Zhu et al., 2013) simulates fluxes through some 70  
131 reactions involved in the light and dark reactions of C<sub>3</sub> photosynthesis. The steady-state  
132 photosynthesis rate predicted by the e-Photosynthesis model replaced the leaf model prediction  
133 that was based on the Farquhar model of photosynthesis (Nikolov et al., 1995). Leaf temperature,  
134 light intensity and intercellular CO<sub>2</sub> concentration predicted by the leaf model were used as  
135 inputs for the e-Photosynthesis model. The integrated leaf metabolic and micrometeorological  
136 model effectively simulates the observed response to net leaf CO<sub>2</sub> uptake to [CO<sub>2</sub>] observed for  
137 soybean in the field (Bernacchi et al., 2005) (Figure 1, Supplemental figure 1). However, it lacks

138 any capacity to predict the observed decrease in  $V_{c,max}$  and increase in  $J_{max}$  that resulted from  
139 growth in elevated  $[CO_2]$ . This is because the model lacks any connection to the underlying  
140 changes in gene expression that may cause this altered photosynthetic phenotype.

141 The altered photosynthetic phenotype likely resulted from adjusted enzyme  
142 concentrations in soybean leaves grown under ambient and elevated  $CO_2$  concentrations. Such  
143  $CO_2$ -induced changes in protein concentrations was shown for total protein concentration in  
144 barley, rice, wheat, soybean, and potato (Taub et al., 2007) and for specific proteins via  
145 proteomic analysis in rice (Bokhari et al., 2007), wheat (Yousuf et al., 2017), and grape (Zhao et  
146 al., 2019). A decrease in the quantity of Rubisco is a pervading feature of plants grown in the  
147 field under elevated  $[CO_2]$  (Ainsworth and Long, 2005). However, the e-Photosynthesis model  
148 only allows substrate ( $CO_2$ ) concentration to change, which results in altered reaction rates, but  
149 lacks capacity to predict acclimatory changes in enzyme concentrations. By including gene  
150 expression data from soybean plants grown under ambient and elevated  $[CO_2]$  (Leakey et al.,  
151 2009), it is possible to make predictions about changes in enzyme concentrations.

152 Gene expression data cannot be used as direct input for the e-Photosynthesis model,  
153 which can only accept enzyme concentrations. Also, transcriptome data from microarray or  
154 RNA-sequencing technologies provide relative and not absolute quantification of mRNA  
155 transcripts. To overcome these challenges and inform the e-Photosynthesis model with gene  
156 expression data, a model was needed to computationally translate mRNA to protein  
157 concentration. An ordinary differential equation (ODE) was adapted from (Becskei and Serrano,  
158 2000), and given as:  $(\Delta p = \left( \frac{1}{1 + \frac{p}{d}} \times L \times r \right) - (U \times p))$ ,

159 Eq. 1

160 where,  $L$  and  $U$  are the estimated gene family-specific protein synthesis and degradation rates (Li  
161 et al., 2017), respectively,  $r$  is the mRNA level,  $p$  is the initial protein concentration, and  $d$  is the  
162 upper limit of protein translation. It is assumed that  $r$  and  $p$  are equal (Edfors et al., 2016), and  $p$   
163 is based on starting protein concentration estimates from the e-Photosynthesis model. To  
164 simulate steady-state protein concentrations in elevated  $CO_2$ ,  $p$  was adjusted based on the  
165 proportion of change in mRNA level between ambient and elevated  $[CO_2]$  for a given gene.

166 The change in predicted, relative protein concentrations between ambient and elevated  
167  $CO_2$  conditions (ProteinRatio) was used to adjust the enzyme concentration and activity of each

168 gene involved in the light and dark reactions of photosynthesis represented in the e-  
169 Photosynthesis model, as follows:

$$V_{\max\_ele} = V_{\max\_0} \cdot [E.ProteinRatio] \quad \text{Eq 2}$$

170  
171 where,  $V_{\max\_ele}$  is the maximum activity of each enzyme in elevated CO<sub>2</sub>,  $V_{\max\_0}$  is the original  
172 maximum activity of each enzyme in ambient CO<sub>2</sub>, and  $E$  is the estimated enzyme  
173 concentration.

174 Because the protein translation model and metabolic/leaf level models are implemented  
175 in different programming languages (Python and MATLAB) respectively, they cannot  
176 communicate with each other directly without significant alteration of the model code or through  
177 manual integration by running the model programs independently and using files to pass  
178 information between them. In order to integrate the models programmatically (Figure 2), we  
179 used the yggdrasil framework. yggdrasil is an open-source Python package developed by the  
180 Crops *in silico* research group for connecting models written in different programming languages  
181 through simple interfaces in the model's language of implementation. Based on information on  
182 the target models and connections between the models provided in human-readable specification  
183 files, yggdrasil runs the designated models in parallel and coordinates asynchronous  
184 communication between the models as they run. Asynchronous message passing allows models  
185 to continue working after sending output to the next model in the network without waiting for  
186 the output to be received, thereby improving the performance of the overall model integration as  
187 models can complete calculations simultaneously in separate processes. yggdrasil currently  
188 supports connecting models written in Python, Matlab, C and C++ on Linux, Mac OS, and  
189 Windows operating systems. Additional information on the yggdrasil package can be found in  
190 (Lang, 2019) or in the documentation (<https://cropsinsilico.github.io/yggdrasil/>).

191

## 192 **METHODS**

### 193 **Differential Expression Analysis of Genes Responding to CO<sub>2</sub>**

194 The soybean transcriptome differential responses to growth in ambient and elevated [CO<sub>2</sub>] was  
195 obtained previously using the Affymetrix *Glycine max* genechip (Leakey et al., 2009). These  
196 data were re-analyzed here to identify differentially expressed (DE) genes corresponding to leaf

197 tissue collected at the beginning of seed set when the canopy has attained full maturity. Probe  
198 sets were normalized using the GC Robust Multi-array Average (GCRMA) method. A one-way  
199 ANOVA was done in the R statistical software environment using the aov function of the stats  
200 package. The reanalysis identified 5005 DEGs on a statistical cutoff of P value  $\leq 0.05$  and  
201 Benjamini-Hochberg False Discover Rate (FDR)  $\leq 0.3$ .

## 202 **Construction of CO<sub>2</sub> responsive Gene Regulatory Network**

### 203 *Co-expression using mutual rank*

204 Mutual rank analysis (Obayashi and Kinoshita, 2009) was used to obtain highly significant co-  
205 expression relationships among differentially expressed genes (DEGs). In mutual rank analysis,  
206 the Pearson Correlation Coefficient (PCC) is calculated between the gene of interest and all other  
207 DEGs, then sorted based on their PCC ranks, in which the gene pair having the highest  
208 correlation value is given rank 1 (Obayashi and Kinoshita, 2009). Mutual Rank is calculated  
209 from PCC rank by taking the geometric mean between PCC ranks from gene A to gene B and  
210 from gene B to gene A, as these can be different. The ranks are scaled between 0 to 1, where MR  
211 of 1 indicates the most significant coexpression interaction. All interactions having an MR  $\geq$   
212  $|0.8|$  and a PCC  $\geq |0.6|$  were selected for the coexpression network. Interactions having a  
213 significant correlation were further filtered to retain only those that had predicted binding  
214 interactions between the TF and target gene as described below.

### 215 *Static Gene Regulatory Network construction and analysis*

216 To analyze gene regulatory networks, a DNA pattern search algorithm was performed  
217 (PlantPAN, <http://plantpan2.itps.ncku.edu.tw/>) (Medina-Rivera et al., 2015) to identify the  
218 presence of known *Cis*-regulatory elements (CREs) in the promoter region of genes of interest.  
219 Known CREs were obtained from the transcription factor databases Transfac (Matys et al.,  
220 2006), JASPAR (Sandelin et al., 2004), CISBP (Weirauch et al., 2014), and PlantTFDB (Jin et  
221 al., 2013), and NewPLACE (Higo et al., 1999). The promoter region considered in this study  
222 was the sequence 1 Kb upstream of the predicted or experimentally verified Transcription Start  
223 Site (TSS) for every gene obtained from PlantProm (Shahmuradov et al., 2003). Promoter  
224 regions of target genes were analyzed for an enrichment of CREs for a particular TF family. For  
225 this analysis, the average number of binding sites for a CRE in the putative 1 Kb up-stream  
226 promoter region of all the genes present in Soybean Wm82.a1.v1 was calculated. If a target gene



227 promoter has a greater than average number of TF family-specific binding sites present in its  
228 promoter, then the CRE of interest is considered over-represented.

229

### 230 **Dynamic Gene Regulatory Network Model Construction**

231 A dynamic Gene Regulatory Network (GRN) model was built using a linear regression  
232 algorithm to infer relationships between a dependent variable (in this case the expression of the  
233 putative target gene) and one or more independent variables (or predictors; in this case TFs). The  
234 resulting linear model was used to predict the response variable based on the states of the  
235 dependent variables. The regression algorithm was run in R using the LM function (Team,  
236 2013), which optimizes variables of the linear model using a least squares fit between the  
237 response and dependent variables on training data (Eq 1) (Bjorck, 1996).

238 For example:

$$mRNA_{Target} = g_0 + (W_1 * mRNA_{TF1}) + (W_2 * mRNA_{TF2}) + \dots \quad \text{Eq 3}$$

239 where,  $g_0$ ,  $W_1$ ,  $W_2$  are least squares optimized parameters for the linear model.  $mRNA_{TF1}$ ,  
240  $mRNA_{TF2}$ , etc. are expression values of TFs predicted to regulated target genes of interest in  
241 the static GRN. Parameters were optimized using training data, which ultimately resulted in a  
242 weight ( $W_x$ ) that corresponds to the level of influence that a TF exerts on a predicted target  
243 gene's expression. A linear model was generated for every gene in the static CO<sub>2</sub>-responsive  
244 GRN, and used to simulate the expression of genes of interest in both ambient and elevated CO<sub>2</sub>  
245 environments. All linear model equations are listed in Supplemental Table 1.

246 The training data was obtained from seven soybean Affymetrix microarray transcriptome  
247 datasets (GSE8432, GSE23129, GSE26198, GSE29740, GSE29741, GSE35427, GSE44685).  
248 While these datasets were derived from a variety of experimental conditions, they were chosen  
249 because samples were taken from similar tissue and developmental stage as those in the CO<sub>2</sub>-  
250 responsive dataset used to build the static GRN (Leakey et al., 2009). Expression data from all  
251 training sets were commonly normalized by GCRMA and quality control analysis was  
252 performed; samples with a high variation in their median expression level within replicates were  
253 removed from the analysis. A total of 213 samples were used to train the linear regression model.  
254 The CO<sub>2</sub>-responsive dataset that is used to build the static GRN was used as a test dataset for the  
255 linear model, to predict expression of the target gene using the optimized weight associated with  
256 every TF.

257

## 258 **Protein translation model**

259 A protein translation model (PTM) adapted from (Becskei and Serrano, 2000) was used to  
260 predict steady-state protein concentrations based on relative mRNA transcript levels (See Eq. 1)  
261 The model parameter  $p$  (and thus  $r$ ) is obtained from the initial protein concentration used in the  
262 e-Photosynthesis metabolic model under the control (ambient  $\text{CO}_2 = 380$  ppm) condition. To  
263 predict initial protein concentration in elevated  $\text{CO}_2$  conditions (550 ppm),  $p$  was adjusted using  
264 the relative fold change in mRNA transcript levels measured between ambient and elevated  $\text{CO}_2$   
265 conditions. As stated earlier,  $L$  and  $U$  are protein synthesis and degradation rates, respectively,  
266 and denotes the increase or decrease in protein abundance per hour (denoted as g/L/hour).  
267 Soybean gene-specific  $L$  and  $U$  rates were estimated based on the rates of their Arabidopsis  
268 orthologs taken from (Li et al., 2017). If ortholog information for a gene was not available,  $L$  and  
269  $U$  were estimated by taking an average of  $L$  and  $U$  rates for all Arabidopsis genes involved in  
270 photosynthesis.

271 The PTM model simulations resulted in steady-state protein concentration ratios between  
272 ambient and elevated  $[\text{CO}_2]$  conditions for every gene. Optimized parameter ' $d$ ' was obtained in  
273 a gene specific manner such that, the steady-state protein concentration ratio between the two  
274 conditions (elevated/ambient) remains constant for that gene after a particular threshold ' $d$ ' (see  
275 Supplemental Table 2). This protein concentration ratio was then used as one of the inputs for the  
276 e-Photosynthesis model (described below) in order to account for changes in gene expression as  
277 a factor influencing the enzyme kinetics of proteins in the primary C metabolism machinery. The  
278 model assumes constant temperature and constant concentration of RNA polymerase (El Samad  
279 et al., 2005).

## 280 **Metabolic photosynthesis model**

281 The soybean photosynthesis metabolic flux (MF) model is based on the e-Photosynthesis model  
282 (Zhu et al., 2013) and implemented in MATLAB. The e-Photosynthesis model is a general  $\text{C}_3$   
283 photosynthesis model that includes each discrete process from light capture to carbohydrate  
284 synthesis, including photorespiratory  $\text{C}_2$  metabolism. In the model, the rate of change of the  
285 concentration of each metabolite is represented by an ordinary differential equation (ODE):

$$\frac{dC}{dt} = V_p - V_u \quad \text{Eq 4}$$

286 Where, [C] represents metabolite concentration;  $V_p$  is the total rate of reaction(s) that produces C,  
287 and  $V_u$  is the rate of consumption. Rate equations for each enzyme catalyzed reaction were  
288 developed based on standard Michaelis-Menten equations for enzyme kinetics, with kinetic  
289 parameters corresponding to a temperature of 25°C. Four enzymes, including Rubisco, did not  
290 satisfy the conditions needed to apply Michaelis-Menten kinetics, and equations for their  
291 catalysis were as in (Zhu et al., 2007). Initial protein concentration of enzymes in the MM  
292 kinetics equation were obtained from (Zhu et al., 2013) (Supplemental Table 3).  $V_{c,max}$  and  $J_{max}$   
293 of soybean grown under ambient and elevated [CO<sub>2</sub>] in the field had been determined previously  
294 (Bernacchi et al., 2005). This was the same germplasm, site and treatments from which the  
295 transcriptional data, used in developing the GRN, was obtained. Here the  $V_{c,max}$  and  $J_{max}$   
296 obtained in ambient [CO<sub>2</sub>] was used to calibrated the metabolic model, which on integration with  
297 the other models was then used to attempt to predict the observed changes in the  $V_{c,max}$  and  $J_{max}$   
298 observed with growth at elevated [CO<sub>2</sub>]. Calibration was achieved by adjusting amounts of  
299 Rubisco to match the  $V_{c,max}$  described for soybean grown in ambient [CO<sub>2</sub>]. All other protein  
300 amounts in the metabolic model, were elevated maintaining the proportion used in (Zhu et al.,  
301 2013), until a  $J_{max}$  was achieved that matched that observed by (Bernacchi et al., 2005). This  
302 required multiplying each by 1.2 over those used in (Zhu et al., 2013) (Supplemental table 3).  
303 The enzyme kinetic parameters of e-Photosynthesis are for 25°C. Leaf temperatures in the  
304 simulations used here slightly exceeded this. To deal with these slight, but variable, increases in  
305 temperature parameters were adjusted to the actual leaf temperature ( $T_i$ ) using a  $Q_{10}$  function, as  
306 described previously (Woodrow and Berry, 1988).

$$k_i = k_{25} \cdot Q_{10}^{\frac{T_i - 25}{10}} \quad \text{Eq 5}$$

307 The predicted enzyme protein concentration changes as a percentage of that in ambient [CO<sub>2</sub>]  
308 were assumed in direct proportion to the changes of enzyme activities ( $V_{max}$ ) in the metabolic  
309 model. For example, if the predicted sedoheptulose-1:5 bisphosphatase (SBPase) protein  
310 concentration was predicted to increase by 3% under elevated [CO<sub>2</sub>], then SBPase activity  
311 ( $V_{max\_Rubisco}$ ) was also increased by 3% in metabolic model.

312

313 *Sensitivity analysis of each step in the metabolic model*

314 Metabolic control analysis defines the quantitative link between the flux through a pathway and  
315 the activity of an enzyme in terms of the flux control coefficient (Fell, 1998). The maximum  
316 activity of each enzyme ( $V_{max i}$ ) was both increased and decreased by 1% individually in the  
317 model to calculate the new photosynthesis rate ( $A^+$  and  $A^-$ ) for the two  $CO_2$  concentrations (350  
318 ppm vs 550 ppm) to identify the enzymes that most influence the net photosynthetic rate. The  
319 flux control coefficient (CC) of each enzyme was calculated as:

$$CC = \frac{\partial A}{\partial V_{max i}} \frac{V_{max i}}{A} \approx \frac{A^+ - A^-}{0.02 \cdot A} \quad \text{Eq 6}$$

320 Where  $A$  is the original net leaf  $CO_2$  uptake rate, before the simulated change in activity of  
321 enzyme  $i$  ( $\partial V_{max i}$ ).

322

### 323 **Leaf level photosynthesis model**

324 At the leaf level, the metabolic model was integrated with leaf level models of stomatal  
325 physiology, and energy balance based on the method of (Nikolov et al., 1995). Here, stomatal  
326 conductance is a function of predicted net leaf  $CO_2$  uptake rate, humidity, and  $[CO_2]$  after  
327 (Collatz et al., 1991). Leaf energy balance takes account of intercepted short and long wave  
328 radiation, radiative energy loss from the leaf, convection and latent heat loss in transpiration.  
329 However, these models are inter-dependent. For example,  $CO_2$  uptake rate affects stomatal  
330 conductance, stomatal conductance affects leaf temperature and leaf temperature affects  $CO_2$   
331 uptake rate. Solving these circular connections is achieved iteratively. Iteration continues until  
332 change to obtain a numerical solution of stomata conductance, leaf temperature, boundary-layer  
333 conductance and photosynthesis rate until changes in all four are  $<0.1\%$  between iterations. This  
334 model is also implemented in MATLAB. Equations and parameters are listed in supplemental  
335 information (Supplemental table 4).

336

## 337 **RESULTS**

338 **A multiscale model of soybean can mimic photosynthetic acclimation observed in FACE**  
339 **experiments**

340 The integrated model predicted new steady-state enzyme concentrations for selected  
341 reactions belonging to the dark reactions and starch synthesis in the e-Photosynthesis model in  
342 response to growth of soybean leaves under elevated [CO<sub>2</sub>]. The ratio of predicted steady-state  
343 enzyme concentrations in elevated to ambient CO<sub>2</sub> is used as one of the inputs in the e-  
344 Photosynthesis model (Supplemental Table 5). Though the magnitude of the change is small, the  
345 predicted CO<sub>2</sub> response is consistent with the altered photosynthetic phenotype, as shown by the  
346 improved fit to the measured response of  $A_{sat}$  to leaf intercellular [CO<sub>2</sub>] and the values of  $V_{c,max}$   
347 and  $J_{max}$  calculated from this response (Bernacchi et al., 2005) (Figure 1). Including the gene  
348 expression data, the  $V_{c,max}$  of the predicted CO<sub>2</sub> response curve decreases from 115 to 109  $\mu\text{mol}$   
349  $\text{m}^{-2} \text{s}^{-1}$ , and  $J_{max}$  of the predicted curve increase from 149 to 153  $\mu\text{mol} \text{m}^{-2} \text{s}^{-1}$ . Simulations reveal  
350 no significant change in leaf temperature, transpiration and stomatal conductance  
351 (Supplementary Figure 1). Importantly, the fully integrated model was able to simulate the  
352 change in photosynthetic rate due to the acclimation response observed in soybean plants grown  
353 under elevated [CO<sub>2</sub>] (Figure 1). The predicted  $A_{sat}$  in 550 ppm [CO<sub>2</sub>] increased by 17.7%  
354 compared to ambient. Predicted metabolite concentrations also changed dynamically with  
355 elevation of [CO<sub>2</sub>], for example RubP decreased, PGA, T3P and SBP increased, as would be  
356 expected from an increased flux into these pools with accelerated carboxylation and decreased  
357 oxygenation at Rubisco (Figure 3).

358  
359 ***in silico* perturbations reveal potential mechanisms for the transcriptional regulation of**  
360 **photosynthetic acclimation**

361 Genes with a functional role in the same biological pathway are often co-expressed and  
362 sometimes co-regulated. The identification of common cis-regulatory elements in the promoters  
363 of tightly co-expressed genes is a good proxy for co-regulation (Allocco et al., 2004). The  
364 corresponding transcription factors that bind to these CREs are promising targets for the  
365 manipulation of whole pathway expression. The re-engineering of photosynthesis is needed to  
366 increase crop productivity in response to climate change (Zhu et al., 2010), such as overcoming  
367 the limitations caused by photosynthetic acclimation at elevated atmospheric [CO<sub>2</sub>]. With a fully  
368 integrated model of photosynthesis it was then possible to simulate the field-level photosynthetic

369 response to genetic perturbations under both ambient (380 ppm) and elevated (550 ppm) [CO<sub>2</sub>].  
370 The ideotype for elevated [CO<sub>2</sub>] is one in which Rubisco content is substantially decreased and  
371 controlling components of the apparatus for RubP regeneration substantially increased. This  
372 problem was approached by revisiting the individual models to identify gene targets that  
373 significantly contribute to deliver this metabolic ideotype.

374

#### 375 *Sensitivity of the system to individual steps within photosynthetic carbon metabolism*

376 To determine which steps in the system exert the strongest control on  $A_{\text{sat}}$  in both ambient and  
377 elevated [CO<sub>2</sub>], a sensitivity analysis was performed by varying each parameter +/- 1% (Table  
378 1). Control coefficients (CCs) are calculated as the ratio of change in the amount of one enzyme  
379 divided by change in  $A_{\text{sat}}$ . If a 1% change in enzyme x results in a 1% change in  $A_{\text{sat}}$  CC = 1, the  
380 maximum possible, while if the change in  $A_{\text{sat}}$  is zero, then CC = 0, meaning that no control is  
381 exerted by that enzyme. The sum of all control coefficients should approximate to 1. Rubisco  
382 has the highest CC of all enzymes in ambient [CO<sub>2</sub>], while SBPase has the highest control  
383 coefficient in elevated CO<sub>2</sub> (Table 1). Nine enzymes with the highest CCs overall (>0.01) were  
384 further evaluated for transcriptional regulation.

#### 385 *A CO<sub>2</sub>-responsive gene regulatory network reveals co-regulated genes*

386 A static gene regulatory network (GRN) of the nine enzymes with the highest CCs from  
387 the e-Photosynthesis model was constructed using transcriptome data from soybean grown under  
388 ambient and elevated [CO<sub>2</sub>] (Leakey et al., 2009). Network nodes represent the genes that  
389 encode the nine enzymes involved in photosynthesis with the highest CC. Network edges  
390 represent regulatory interactions between TFs and putative, co-expressed target genes as  
391 determined by rank correlation of expression (MR  $\geq$  0.8 and PCC  $\geq$  |0.6|) and the significant  
392 presence of CREs in the promoter of target genes for a corresponding TF gene. The static GRN  
393 was used to define the regulatory interactions that contribute to the expression of each target  
394 gene, in which each gene of interest (GOI) may have more than one TF protein regulating its  
395 expression. A linear regression modeling approach (Karlebach and Shamir, 2008) was used to  
396 determine the strength of influence, or weight (w), of each TF predicted to regulate a GOI. The  
397 resulting equations containing weighted TF-target interactions that enabled dynamic simulations  
398 with the GRN, where the expression of any TF in the network could be modified (up- or down-  
399 regulated) and result in a predicted change in expression of the target GOI (Figure 4).

400 The dynamic GRN (Figure 5) was explored to identify TFs that would simultaneously  
401 down-regulate carboxylation of Rubisco and up-regulate RubP regeneration and starch synthesis.  
402 Based on network topology, the top three candidate TFs are GmWRKY71 (Glyma.07G023300),  
403 a bHLH transcription factor (Glyma.18G115700), and GmGATA2 (Glyma.01G169400)  
404 (Supplemental Figure 2). *in silico* perturbations were performed for each candidate TF in which  
405 the TF expression was eliminated (knock-out) or overexpressed. Simulations within the dynamic  
406 GRN resulted in newly predicted expression levels of all genes targeted by the TF of interest  
407 (Figure 4).

408 The predicted change in mRNA expression provided input for the protein translation  
409 model that in turn predicted steady-state enzyme concentrations under elevated and ambient  
410 [CO<sub>2</sub>] as described in the Model Development section. The ratio of steady-state protein levels  
411 were then fed into the fully integrated photosynthesis model to obtain predicted changes in  
412 photosynthesis rate. The *in silico* over-expression of GmWRKY71 and GmGATA2, and the  
413 knockout of the bHLH TF resulted in a predicted increase in photosynthetic rate under both  
414 ambient and elevated [CO<sub>2</sub>]. A simultaneous *in silico* over-expression of GmWRKY71 and  
415 knock-out of bHLH TF increased the overall photosynthesis rate compared to wild type, but  
416 these failed to significantly lower Rubisco and release the resource that would be needed to  
417 elevate capacity for RubP regeneration without more resource investment (Figure 6A-C). The  
418 most promising TF candidate according to model simulations is the overexpression of  
419 GmGATA2, which results in the most dramatic change to both the down-regulation of  
420 carboxylation and up-regulation of RubP regeneration based on the simulated A/Ci curve (Figure  
421 6D).

422

## 423 **DISCUSSION**

424 Multi-scale models have the potential to identify and add missing mechanistic details  
425 about system function and generate new hypotheses to prioritize targeted engineering efforts in  
426 plant science (Marshall-Colon et al., 2017, Millar et al., 2019). More than 4,000 mathematical  
427 plant models were published over the last decade. The majority of these models describe one  
428 biological scale or process and generalize the un-modeled spatio-temporal processes as a single  
429 output from a black box. Linking single-scale models will improve the comprehensive  
430 investigation of biological systems, resulting in explanatory models with higher prediction

431 accuracy than models limited to one biological scale. The ability to interrogate biology at many  
432 resolutions can reveal emergent system behaviors that cannot easily be measured (Walpole et al.,  
433 2013). Multiscale models that link genes to phenotypes can accelerate the directed development  
434 of crop ideotypes. Until now metabolic modeling has predicted ideotypes with maximal  
435 photosynthetic efficiency for given environmental conditions with respect to distribution of  
436 resources between photosynthetic proteins. Achieving the ideotype then depends on identifying  
437 individual genes that might be up- or down- regulated. The multi-scale model may now be used  
438 not only to predict the metabolic ideotype, but the gene expression changes at the network level  
439 needed to achieve this. In turn, this has led, as demonstrated here, to the identification of  
440 transcription factors that can achieve the multiple gene expression changes needed by alteration  
441 of the expression of just one or two transcription factors.

442 In this study, we constructed a multiscale model of soybean leaf photosynthesis by  
443 integrating three models across molecular and organ-level scales using asynchronous message  
444 passing. By informing the leaf micrometeorological model with gene-level data, we were able to  
445 simulate the field-observed phenomena of photosynthetic acclimation in soybean plants grown  
446 under two different atmospheric CO<sub>2</sub> concentrations. Acclimation was previously suggested to  
447 be a transcriptionally driven process that increases the capacity of respiration (Leakey et al.,  
448 2009). This though does not explain the observed decrease in in vivo Rubisco activity ( $V_{c,max}$ )  
449 and increase in capacity for RuBP regeneration ( $J_{max}$ ) by (Bernacchi et al., 2005). Existing  
450 models of photosynthesis do not provide a means to link observed transcriptional changes with  
451 metabolism and photosynthetic capacity at the leaf level. Our integrated model overcomes this  
452 and not only suggests the changes in mRNA levels and how these affect photosynthetic  
453 metabolism, but was able to predict the acclimation of photosynthetic CO<sub>2</sub> assimilation that had  
454 been observed (Figure 1). Previous studies have reported proteome-level changes in response to  
455 elevated CO<sub>2</sub> in soybean and other crop species (Ainsworth and Long, 2005, Bokhari et al.,  
456 2007, Taub et al., 2007, Yousuf et al., 2017, Zhao et al., 2019).

457 Interestingly, only 48 out of the 81 genes that encode enzymes in the e-Photosynthesis  
458 model had a statistically significant change in expression in elevated [CO<sub>2</sub>], and only 17 had a  
459 fold change >1.5. Since the ratio of change in enzyme concentration was proportional to the  
460 change in transcript concentration, it reveals that even a slight modification to the e-  
461 Photosynthesis model resulted in better prediction accuracy of field observations. This result



462 represents the double-edged sword of multiscale modeling, in which fine-tuning at the molecular  
463 level can have drastic consequences at higher scales. Errors can propagate in multiscale models  
464 as information is exchanged across spatial and temporal scales. However, empirical validation of  
465 the model outputs at any scale can minimize error propagation. In our study, field data  
466 corroborated model simulations, providing confidence in the success of the modeling approach  
467 and the biologically relevant flow of information from genes to organs.

468

469 *in silico perturbations identified transcriptional regulators of photosynthesis*

470 The successful manipulation of photosynthetic efficiency has been achieved through  
471 targeted engineering of individual enzymes (Köhler et al., 2017, Driever et al., 2017), but an  
472 alternative strategy is to simultaneously alter the expression of suites of enzymes involved in  
473 different parts of the photosynthesis pathway (Simkin et al., 2017). Understanding the  
474 transcriptional regulation of photosynthesis genes may help to fine-tune pathway expression  
475 under different environmental conditions, so avoiding the need to directly engineer change in  
476 expression of genes for each enzyme. This study uncovered three TFs, GmWRKY71,  
477 GmGATA2, and a bHLH TF, which potentially regulate the expression of genes encoding key  
478 enzymes involved in photosynthesis. While the transcriptional and post-transcriptional regulation  
479 of genes involved in photosynthesis have previously been explored (Isono et al., 1997,  
480 Fankhauser and Aubry, 2016, Saibo et al., 2008, Wang et al., 2017a, Zhang et al., 2016), this is  
481 the first report of targeted GRN analysis to identify TFs that specifically co-regulate the  
482 carboxylation of Rubisco and RubP regeneration.

483 Our hypothesis driven approach sought to explore how decreasing Rubisco and  
484 reallocating resources to RubP regeneration might increase  $A_{sat}$ . The dynamic GRN identified  
485 high-confidence TF-target gene relationships between photosynthesis genes that have a high  
486 control coefficient and TFs tightly co-expressed with those genes. Using diverse training data,  
487 we were able to derive weights associated with each TF-target interaction, indicating which TFs  
488 exerted the greatest transcriptional control. Several TFs were found to co-regulate genes  
489 affecting Rubisco and RubP regeneration (Figure 5). However, only GmGATA2 was predicted  
490 to significantly down-regulate genes affecting Rubisco synthesis and up-regulating genes that  
491 would increase RubP regeneration and starch synthesis. The multiscale model simulations for the  
492 knockout and overexpression of GmGATA2 suggest a mechanism by which the transcriptional

493 regulation of key photosynthetic genes can alter flux through the pathway. For example, the  
494 overexpression of GmGATA2 resulted in decreased  $V_{c\_max}$  and increased  $J_{max}$ , as would be  
495 required to maximize efficiency in an elevated  $[CO_2]$  environment (Table 2; (Drake et al., 1997,  
496 Long et al., 2004)). The rewiring of metabolism, under both ambient and elevated  $CO_2$ , produces  
497 a change in photosynthetic efficiency, which is a leaf-level phenotype. Specifically, the KO of  
498 GmGATA2 decreases overall photosynthetic capacity only in ambient  $[CO_2]$ , while  
499 overexpression results in a large decrease in carboxylation and increase in RubP regeneration  
500 according to the A/Ci curve (Figure 6D).

501 All of the top candidate TFs from our model simulations belong to TF families that have  
502 previously been implicated in the transcriptional regulation of photosynthesis (Saibo et al.,  
503 2008). For example, bHLH TFs (Myc Family of TFs) were found to regulate aspects of  $C_4$   
504 photosynthesis that are also related to genes in the ancestral  $C_3$  state (Borba et al., 2018).  
505 Interestingly, a number of other studies identified the GATA family of transcription factors as  
506 important regulators of photosynthesis and of carbon and nitrogen balance. The overexpression  
507 of Class B GATAs and GLKs in Arabidopsis roots improved photosynthesis by increasing root  
508 chlorophyll content (Ohnishi et al., 2018). GmGATA2 is annotated as NITRATE-INDUCIBLE,  
509 CARBON METABOLISM-INVOLVED (GNC) and is homologous to AtGATA5, and both are  
510 Class A GATAs that are associated with the light regulation of gene expression and  
511 photomorphogenesis (Zhang et al., 2015). The overexpression of the poplar PdGNC gene in  
512 Arabidopsis improved photosynthesis under low N levels by increasing the size and number of  
513 chloroplasts per cell. The photosynthetic rate in transgenics increased by 42% compared to WT  
514 lines (An et al., 2014). These studies with structurally or functionally similar GATA TFs provide  
515 support for the role of GmGATA2 in the regulation of photosynthesis. Our GRN analysis  
516 uncovered a strong positive correlation (co-expression) between GmGATA2 and FBP-aldolase  
517 and starch synthase and a strong negative correlation (anti-correlation) between GmGATA2 and  
518 the gene Rbcs that encodes the RuBisCO small sub-unit. Metabolic modeling and direct up-  
519 regulation have suggested that both FBP-aldolase and starch synthase exert strong control on  
520 RubP-regeneration (Zhu et al., 2007, Uematsu et al., 2012, Tian et al., 2018). These network  
521 predictions provide testable hypotheses for the next round of experimentation and modeling.

522 The multiscale modeling strategy described here represents a uni-directional flow of  
523 information from genes to physiological phenotype. However, bi-directional inputs and outputs

524 exist between the e-Photosynthesis model and the leaf micrometeorological model, in which the  
525 metabolic model can accept environmental parameters from the organ-level model. Ideally, a  
526 truly dynamic and biologically accurate model would have a bi- or multi-directional flow of  
527 information across scales. A limitation of this model is a lack of feedback from the metabolic  
528 model to gene expression. This limitation stems from an inadequate amount of species- and  
529 condition-specific transcriptional studies. Given the availability of more expression data, it  
530 would be possible to include a model component with switch-like behavior that pulls in  
531 appropriate expression data based on environment-level inputs. Alternatively, given protein  
532 expression data it may be possible to leverage the proportional relationship between change in  
533 protein concentration and change in transcript levels to predict gene expression based on protein  
534 levels. Regardless of the method, this gap in information flow is an area of focus to improve the  
535 current model. Moreover, this multiscale model is focused on one biological process,  
536 photosynthesis. The proof-of-concept modeling approach outlined in our study provides a  
537 feasible workflow, and a base model that can be expanded on to include related pathways and  
538 processes that are still black boxes and beyond the scope of in our current model.

539

#### 540 *Future directions.*

541 We are now poised to explore the multiscale model generated hypotheses, including the  
542 functional testing of the top TF candidate genes. Ideally, these hypotheses will be tested directly  
543 in soybean through the generation of transgenic plants that can be grown in FACE experiments  
544 (Ainsworth et al., 2008). Likewise, the model is in place for expansion to include additional  
545 metabolic pathways, but also scale to other levels. For example, the leaf micrometeorological  
546 model is already a sub-component of a canopy-level model (Drewry et al., 2010, Srinivasan et  
547 al., 2017), so an intuitive next step would be link to models that provide 3-D biophysical  
548 representations of stands of plants, as for example those developed for sugarcane agronomy  
549 (Wang et al., 2017b). This allows simulations with more realistic inputs for light capture and  
550 competition between plants. Finally, advanced visualization of multiscale model outputs will be  
551 an important next step in the simulation and analysis of *in silico* crops. Combined modeling and  
552 visualization approaches will lead to realistic simulations of ideotypes to guide selection of  
553 genetic targets for crop improvement (Marshall-Colon et al., 2017).

554

555 *Conclusion*

556 Despite the many assumptions that have had to be made in this first linkage of gene expression  
557 networks, through protein concentrations and photosynthetic metabolism to leaf level CO<sub>2</sub>  
558 exchange, it was successful in accurately predicting the observed acclimation of photosynthetic  
559 capacity in soybean when grown under elevated [CO<sub>2</sub>]. Most importantly it is shown to provide  
560 a numerical means to identify from many hundreds of possible transcription factors, those most  
561 likely to adapt photosynthetic efficiency to global atmospheric change. It opens the way to  
562 guiding sustainable adaptation of crop photosynthesis to a range of both current and future  
563 environments.

564

565 **ACKNOWLEDGEMENTS**

566 Funding for this work was provided by the FFAR, awards 515760 and 602757 to AMC, SPL,  
567 and MML and from a seed grant from the Institute for Sustainability, Energy, and  
568 Environment at UIUC, and the National Center for Supercomputing Applications at UIUC.  
569 The authors would like to thank Dr. Zoi Rapti and Dr. Saurabh Sinha at the University of  
570 Illinois for their guidance in development of the translation model and dynamic GRN,  
571 respectively. We thank Dr. Venkat Srinivasan, at the University of Illinois, for valuable  
572 discussions and advice on linking leaf energy balance with CO<sub>2</sub> assimilation and stomatal  
573 conductance.

574  
575 **Author Contributions:** AMC, SPL, YW, and KK designed the study. KK, YW, GSC performed  
576 computational analysis. MML designed the computational interface. AMC, SPL, KK, YW, GSC,  
577 and MML wrote the paper.

578

579 **REFERENCES**

- 580 **Ainsworth EA, Beier C, Calfapietra C, Ceulemans R, Durand-Tardif M, Farquhar GD,**  
581 **Godbold DL, Hendrey GR, Hickler T, Kaduk J, Karnosky DF, Kimball BA,**  
582 **Koerner C, Koornneef M, Lafarge T, Leakey ADB, Lewin KF, Long SP,**  
583 **Manderscheid R, McNeil DL, Mies TA, Miglietta F, Morgan JA, Nagy J, Norby RJ,**  
584 **Norton RM, Percy KE, Rogers A, Soussana JF, Stitt M, Weigel HJ, White JW. 2008.**  
585 **Next generation of elevated CO<sub>2</sub> experiments with crops: a critical investment for**  
586 **feeding the future world. *Plant Cell and Environment*, **31**: 1317-1324.**
- 587 **Ainsworth EA, Long SP. 2005.** What have we learned from 15 years of free-air CO<sub>2</sub>  
588 enrichment (FACE)? A meta-analytic review of the responses of photosynthesis,  
589 canopy properties and plant production to rising CO<sub>2</sub>. *New phytologist*, **165**: 351-  
590 372.
- 591 **Allocco DJ, Kohane IS, Butte AJ. 2004.** Quantifying the relationship between co-  
592 expression, co-regulation and gene function. *BMC bioinformatics*, **5**: 18.
- 593 **An Y, Han X, Tang S, Xia X, Yin W. 2014.** Poplar GATA transcription factor PdGNC is  
594 capable of regulating chloroplast ultrastructure, photosynthesis, and vegetative  
595 growth in Arabidopsis under varying nitrogen levels. *Plant Cell, Tissue and Organ*  
596 *Culture (PCTOC)*, **119**: 313-327.
- 597 **Becskei A, Serrano L. 2000.** Engineering stability in gene networks by autoregulation.  
598 *Nature*, **405**: 590.
- 599 **Bernacchi CJ, Morgan PB, Ort DR, Long SP. 2005.** The growth of soybean under free air  
600 [CO<sub>2</sub>] enrichment (FACE) stimulates photosynthesis while decreasing in vivo  
601 Rubisco capacity. *Planta*, **220**: 434-446.
- 602 **Bjorck A. 1996.** *Numerical methods for least squares problems*: Siam.
- 603 **Bokhari SA, Wan X-Y, Yang Y-W, Zhou L, Tang W-L, Liu J-Y. 2007.** Proteomic response of  
604 rice seedling leaves to elevated CO<sub>2</sub> levels. *Journal of proteome research*, **6**: 4624-  
605 4633.
- 606 **Borba AR, Serra TS, Górska A, Gouveia P, Cordeiro AM, Reyna-Llorens I, Kneřová J,**  
607 **Barros PM, Abreu IA, Oliveira MM. 2018.** Synergistic binding of bHLH  
608 transcription factors to the promoter of the maize NADP-ME gene used in C<sub>4</sub>  
609 photosynthesis is based on an ancient code found in the ancestral C<sub>3</sub> state.  
610 *Molecular biology and evolution*, **35**: 1690-1705.
- 611 **Chew YH, Wenden B, Flis A, Mengin V, Taylor J, Davey CL, Tindal C, Thomas H,**  
612 **Ougham HJ, De Reffye P. 2014.** Multiscale digital Arabidopsis predicts individual  
613 organ and whole-organism growth. *Proceedings of the National Academy of Sciences*,  
614 **111**: E4127-E4136.
- 615 **Collatz GJ, Ball JT, Grivet C, Berry JA. 1991.** Physiological and environmental regulation  
616 of stomatal conductance, photosynthesis and transpiration: a model that includes a  
617 laminar boundary layer. *Agricultural and Forest meteorology*, **54**: 107-136.
- 618 **Drake BG, González-Meler MA, Long SP. 1997.** More efficient plants: a consequence of  
619 rising atmospheric CO<sub>2</sub>? *Annual review of plant biology*, **48**: 609-639.
- 620 **Drewry D, Kumar P, Long S, Bernacchi C, Liang XZ, Sivapalan M. 2010.** Ecohydrological  
621 responses of dense canopies to environmental variability: 1. Interplay between  
622 vertical structure and photosynthetic pathway. *Journal of Geophysical Research:*  
623 *Biogeosciences*, **115**.

- 624 **Driever SM, Simkin AJ, Alotaibi S, Fisk SJ, Madgwick PJ, Sparks CA, Jones HD, Lawson**  
625 **T, Parry MA, Raines CA. 2017.** Increased SBPase activity improves photosynthesis  
626 and grain yield in wheat grown in greenhouse conditions. *Philosophical Transactions*  
627 *of the Royal Society B: Biological Sciences*, **372**: 20160384.
- 628 **Edfors F, Danielsson F, Hallström BM, Käll L, Lundberg E, Pontén F, Forsström B,**  
629 **Uhlén M. 2016.** Gene-specific correlation of RNA and protein levels in human cells  
630 and tissues. *Molecular systems biology*, **12**: 883.
- 631 **El Samad H, Khammash M, Petzold L, Gillespie D. 2005.** Stochastic modelling of gene  
632 regulatory networks. *International Journal of Robust and Nonlinear Control:*  
633 *IFAC Affiliated Journal*, **15**: 691-711.
- 634 **Fankhauser N, Aubry S. 2016.** Post-transcriptional regulation of photosynthetic genes is a  
635 key driver of C4 leaf ontogeny. *Journal of experimental botany*, **68**: 137-146.
- 636 **Farquhar GD, von Caemmerer Sv, Berry J. 1980.** A biochemical model of photosynthetic  
637 CO<sub>2</sub> assimilation in leaves of C<sub>3</sub> species. *Planta*, **149**: 78-90.
- 638 **Fell DA. 1998.** Increasing the flux in metabolic pathways: a metabolic control analysis  
639 perspective. *Biotechnology and Bioengineering*, **58**: 121-124.
- 640 **Higo K, Ugawa Y, Iwamoto M, Korenaga T. 1999.** Plant cis-acting regulatory DNA  
641 elements (PLACE) database: 1999. *Nucleic acids research*, **27**: 297-300.
- 642 **Isono K, Niwa Y, Satoh K, Kobayashi H. 1997.** Evidence for transcriptional regulation of  
643 plastid photosynthesis genes in *Arabidopsis thaliana* roots. *Plant physiology*, **114**:  
644 623-630.
- 645 **Jin J, Zhang H, Kong L, Gao G, Luo J. 2013.** PlantTFDB 3.0: a portal for the functional and  
646 evolutionary study of plant transcription factors. *Nucleic acids research*, **42**: D1182-  
647 D1187.
- 648 **Karlebach G, Shamir R. 2008.** Modelling and analysis of gene regulatory networks. *Nature*  
649 *Reviews Molecular Cell Biology*, **9**: 770.
- 650 **Köhler L, Ebrahimizadeh Abrishami M, Roddatis V, Geppert J, Risch M. 2017.**  
651 Mechanistic Parameters of Electrocatalytic Water Oxidation on LiMn<sub>2</sub>O<sub>4</sub> in  
652 Comparison to Natural Photosynthesis. *ChemSusChem*, **10**: 4479-4490.
- 653 **Lang M. 2019.** yggdrasil: A Python Package for Integrating Computational Models Across  
654 Languages and Scales. *in silico Plants*.
- 655 **Leakey AD, Xu F, Gillespie KM, McGrath JM, Ainsworth EA, Ort DR. 2009.** Genomic basis  
656 for stimulated respiration by plants growing under elevated carbon dioxide.  
657 *Proceedings of the National Academy of Sciences: pnas*. 0810955106.
- 658 **Li L, Nelson CJ, Trösch J, Castleden I, Huang S, Millar AH. 2017.** Protein degradation rate  
659 in *Arabidopsis thaliana* leaf growth and development. *The Plant Cell*, **29**: 207-228.
- 660 **Long SP, Ainsworth EA, Leakey AD, Nösberger J, Ort DR. 2006.** Food for thought: lower-  
661 than-expected crop yield stimulation with rising CO<sub>2</sub> concentrations. *science*, **312**:  
662 1918-1921.
- 663 **Long SP, Ainsworth EA, Rogers A, Ort DR. 2004.** Rising atmospheric carbon dioxide:  
664 plants FACE the future. *Annu. Rev. Plant Biol.*, **55**: 591-628.
- 665 **Marshall-Colon A, Long SP, Allen DK, Allen G, Beard DA, Benes B, von Caemmerer S,**  
666 **Christensen AJ, Cox DJ, Hart JC, Hirst PM, Kannan K, Katz DS, Lynch JP, Millar**  
667 **AJ, Panneerselvam B, Price ND, Prusinkiewicz P, Raila D, Shekar RG,**  
668 **Shrivastava S, Shukla D, Srinivasan V, Stitt M, Turk MJ, Voit EO, Wang Y, Yin XY,**

- 669 **Zhu XG. 2017.** Crops In Silico: Generating Virtual Crops Using an Integrative and  
670 Multi-scale Modeling Platform. *Frontiers in Plant Science*, **8**.
- 671 **Matys V, Kel-Margoulis OV, Fricke E, Liebich I, Land S, Barre-Dirrie A, Reuter I,**  
672 **Chekmenev D, Krull M, Hornischer K. 2006.** TRANSFAC® and its module  
673 TRANSCompel®: transcriptional gene regulation in eukaryotes. *Nucleic acids*  
674 *research*, **34**: D108-D110.
- 675 **Medina-Rivera A, Defrance M, Sand O, Herrmann C, Castro-Mondragon JA, Delerce J,**  
676 **Jaeger S, Blanchet C, Vincens P, Caron C. 2015.** RSAT 2015: regulatory sequence  
677 analysis tools. *Nucleic acids research*, **43**: W50-W56.
- 678 **Millar AJ, Urquiza JU, Freeman PL, Hume A, Plotkin GD, Sorokina O, Zardilis A,**  
679 **Zielinski T. 2019.** Practical steps to digital organism models, from laboratory  
680 model species to 'Crops in silico'. *Journal of experimental botany*.
- 681 **Nikolov NT, Massman WJ, Schoettle AW. 1995.** Coupling biochemical and biophysical  
682 processes at the leaf level: an equilibrium photosynthesis model for leaves of C3  
683 plants. *Ecological Modelling*, **80**: 205-235.
- 684 **Obayashi T, Kinoshita K. 2009.** Rank of correlation coefficient as a comparable measure  
685 for biological significance of gene coexpression. *DNA research*, **16**: 249-260.
- 686 **Ohnishi A, Wada H, Kobayashi K. 2018.** Improved photosynthesis in Arabidopsis roots by  
687 activation of GATA transcription factors. *Photosynthetica*, **56**: 433-444.
- 688 **Pachauri R, Meyer L, Plattner G, Stocker T. 2014.** IPCC, 2014: climate change 2014:  
689 synthesis report. *IPCC, Geneva, Switzerland*.
- 690 **Raines CA. 2003.** The Calvin cycle revisited. *Photosynthesis research*, **75**: 1-10.
- 691 **Saibo NJ, Lourenço T, Oliveira MM. 2008.** Transcription factors and regulation of  
692 photosynthetic and related metabolism under environmental stresses. *Annals of*  
693 *botany*, **103**: 609-623.
- 694 **Sandelin A, Alkema W, Engström P, Wasserman WW, Lenhard B. 2004.** JASPAR: an  
695 open-access database for eukaryotic transcription factor binding profiles. *Nucleic*  
696 *acids research*, **32**: D91-D94.
- 697 **Shahmuradov IA, Gammerman AJ, Hancock JM, Bramley PM, Solovyev VV. 2003.**  
698 PlantProm: a database of plant promoter sequences. *Nucleic acids research*, **31**: 114-  
699 117.
- 700 **Simkin AJ, Lopez-Calcagno PE, Davey PA, Headland LR, Lawson T, Timm S, Bauwe H,**  
701 **Raines CA. 2017.** Simultaneous stimulation of sedoheptulose 1,7-bisphosphatase,  
702 fructose 1,6-bisphosphate aldolase and the photorespiratory glycine decarboxylase-  
703 H protein increases CO<sub>2</sub> assimilation, vegetative biomass and seed yield in  
704 Arabidopsis. *Plant Biotechnology Journal*, **15**: 805-816.
- 705 **Srinivasan V, Kumar P, Long SP. 2017.** Decreasing, not increasing, leaf area will raise  
706 crop yields under global atmospheric change. *Global Change Biology*, **23**: 1626-1635.
- 707 **Stitt M, Sonnewald U. 1995.** Regulation of metabolism in transgenic plants. *Annual review*  
708 *of plant biology*, **46**: 341-368.
- 709 **Taub D, Miller B, Allen H, Wang X. 2007.** OOS 30-4: Effects of elevated CO<sub>2</sub> on the  
710 nutritional composition of food crops.
- 711 **Team RC. 2013.** R: A language and environment for statistical computing.
- 712 **Tian B, Talukder SK, Fu JM, Fritz AK, Trick HN. 2018.** Expression of a rice soluble starch  
713 synthase gene in transgenic wheat improves the grain yield under heat stress  
714 conditions. *In Vitro Cellular & Developmental Biology-Plant*, **54**: 216-227.



- 715 **Uematsu K, Suzuki N, Iwamae T, Inui M, Yukawa H. 2012.** Increased fructose 1,6-  
716 bisphosphate aldolase in plastids enhances growth and photosynthesis of tobacco  
717 plants. *Journal of Experimental Botany*, **63**: 3001-3009.
- 718 **Von Caemmerer S. 2000.** *Biochemical models of leaf photosynthesis*: Csiro publishing.
- 719 **Walpole J, Papin JA, Peirce SM. 2013.** Multiscale computational models of complex  
720 biological systems. *Annual review of biomedical engineering*, **15**: 137-154.
- 721 **Wang P, Hendron RW, Kelly S. 2017a.** Transcriptional control of photosynthetic capacity:  
722 conservation and divergence from Arabidopsis to rice. *New Phytologist*, **216**: 32-45.
- 723 **Wang Y, Song QF, Jaiswal D, de Souza AP, Long SP, Zhu XG. 2017b.** Development of a  
724 Three-Dimensional Ray-Tracing Model of Sugarcane Canopy Photosynthesis and Its  
725 Application in Assessing Impacts of Varied Row Spacing. *Bioenergy Research*, **10**:  
726 626-634.
- 727 **Weirauch MT, Yang A, Albu M, Cote AG, Montenegro-Montero A, Drewe P, Najafabadi  
728 HS, Lambert SA, Mann I, Cook K. 2014.** Determination and inference of eukaryotic  
729 transcription factor sequence specificity. *Cell*, **158**: 1431-1443.
- 730 **Woodrow IE. 1994.** Optimal acclimation of the C<sub>3</sub> photosynthetic system under enhanced  
731 CO<sub>2</sub>. *Photosynthesis Research*, **39**: 401-412.
- 732 **Woodrow IE, Berry J. 1988.** Enzymatic regulation of photosynthetic CO<sub>2</sub> fixation in C<sub>3</sub>  
733 plants. *Annual Review of Plant Physiology and Plant Molecular Biology*, **39**: 533-594.
- 734 **Yousuf PY, Abd\_Allah EF, Nauman M, Asif A, Hashem A, Alqarawi AA, Ahmad A. 2017.**  
735 Responsive proteins in wheat cultivars with contrasting nitrogen efficiencies under  
736 the combined stress of high temperature and low nitrogen. *Genes*, **8**: 356.
- 737 **Zhang C, Hou Y, Hao Q, Chen H, Chen L, Yuan S, Shan Z, Zhang X, Yang Z, Qiu D. 2015.**  
738 Genome-wide survey of the soybean GATA transcription factor gene family and  
739 expression analysis under low nitrogen stress. *PloS one*, **10**: e0125174.
- 740 **Zhang J, Du H, Chao M, Yin Z, Yang H, Li Y, Huang F, Yu D. 2016.** Identification of two  
741 bZIP transcription factors interacting with the promoter of soybean rubisco activase  
742 gene (GmRCA $\alpha$ ). *Frontiers in plant science*, **7**: 628.
- 743 **Zhao X, Li W-F, Wang Y, Ma Z-H, Yang S-J, Zhou Q, Mao J, Chen B-H. 2019.** Elevated CO<sub>2</sub>  
744 concentration promotes photosynthesis of grape (*Vitis vinifera* L. cv. 'Pinot noir')  
745 plantlet in vitro by regulating RbcS and Rca revealed by proteomic and  
746 transcriptomic profiles. *BMC plant biology*, **19**: 42.
- 747 **Zhu X-G, de Sturler E, Long SP. 2007.** Optimizing the distribution of resources between  
748 enzymes of carbon metabolism can dramatically increase photosynthetic rate: a  
749 numerical simulation using an evolutionary algorithm. *Plant physiology*, **145**: 513-  
750 526.
- 751 **Zhu X-G, Long SP, Ort DR. 2010.** Improving photosynthetic efficiency for greater yield.  
752 *Annual review of plant biology*, **61**: 235-261.
- 753 **Zhu XG, Wang Y, Ort DR, Long SP. 2013.** e-photosynthesis: a comprehensive dynamic  
754 mechanistic model of C<sub>3</sub> photosynthesis: from light capture to sucrose synthesis.  
755 *Plant, cell & environment*, **36**: 1711-1727.

756

757 **TABLES**

758 Table 1. The flux control coefficient of photosynthetic enzymes in ambient and elevated CO<sub>2</sub>.

| <b>Enzyme</b>                                             | <b>Value<br/>(<math>\mu\text{mol m}^{-2} \text{s}^{-1}</math>)</b> | <b>Meta<br/>(AmbCO<sub>2</sub>)</b> | <b>Meta<br/>(EleCO<sub>2</sub>)</b> | <b>Meta+GE<br/>(EleCO<sub>2</sub>)</b> | <b>Meta+GE<br/>(EleCO<sub>2</sub>)*</b> |
|-----------------------------------------------------------|--------------------------------------------------------------------|-------------------------------------|-------------------------------------|----------------------------------------|-----------------------------------------|
| Rubisco                                                   | 120                                                                | 0.443                               | 0.121                               | 0.165                                  | 0.108                                   |
| Sedoheptulose-bisphosphatase                              | 13.35                                                              | 0.305                               | 0.674                               | 0.605                                  | 0.746                                   |
| Fructose-bisphosphate aldolase                            | 50.2                                                               | 0.114                               | 0.091                               | 0.077                                  | 0.047                                   |
| Glucose-1-phosphate<br>adenylyltransferase                | 8.01                                                               | 0.076                               | 0.058                               | 0.055                                  | 0.035                                   |
| The maximum rate of ATP<br>synthesis                      | 6                                                                  | 0.054                               | 0.047                               | 0.081                                  | 0.051                                   |
| Fructose-bisphosphatases                                  | 29.91                                                              | 0.039                               | 0.031                               | 0.030                                  | 0.021                                   |
| UTP-glucose-1-phosphate<br>uridylyltransferase            | 3.46                                                               | 0.021                               | 0.014                               | 0.014                                  | 0.009                                   |
| Fructose-bisphosphatase (C)                               | 1.92                                                               | 0.014                               | 0.010                               | 0.011                                  | 0.007                                   |
| Fructose-2,6-bisphosphate 2-<br>phosphatase               | 0.5                                                                | 0.010                               | 0.007                               | 0.006                                  | 0.004                                   |
| Transketolase                                             | 128.57                                                             | 0.008                               | 0.003                               | 0.003                                  | 0.001                                   |
| Fructose-bisphosphate aldolase<br>(C)                     | 3.22                                                               | 0.007                               | 0.005                               | 0.005                                  | 0.003                                   |
| Glycine transaminase                                      | 82.37                                                              | 0.007                               | 0.002                               | 0.001                                  | 0.001                                   |
| (S)-2-hydroxy-acid oxidase<br>& Catalase(CAT, EC1.11.1.6) | 43.68                                                              | 0.001                               | 0.000                               | 0.000                                  | 0.000                                   |
| Sucrose-phosphate synthase                                | 1.67                                                               | 0.001                               | 0.001                               | 0.002                                  | 0.002                                   |
| Phosphoribulokinase                                       | 446.19                                                             | 0.001                               | -0.001                              | -0.001                                 | 0.000                                   |
| glycine dehydrogenase<br>(aminomethyl-transferring)       | 74.84                                                              | 0.000                               | 0.000                               | 0.000                                  | 0.000                                   |
| Glycerate kinase                                          | 171.47                                                             | -0.001                              | 0.001                               | -0.001                                 | 0.000                                   |
| Glyceraldehyde-3-phosphate<br>dehydrogenase (NADP+)       | 166.35                                                             | -0.001                              | 0.001                               | 0.001                                  | 0.000                                   |
| Glycerate dehydrogenase                                   | 300.29                                                             | -0.001                              | 0.000                               | 0.000                                  | 0.000                                   |
| Phosphoglycolate phosphatase                              | 1572.6                                                             | -0.001                              | 0.000                               | 0.000                                  | 0.000                                   |
| Sucrose-phosphate phosphatase                             | 16.65                                                              | -0.002                              | 0.000                               | 0.000                                  | 0.000                                   |
| Serine-glyoxylate transaminase                            | 99.19                                                              | -0.004                              | -0.003                              | -0.002                                 | -0.001                                  |
| 6-phosphofructo-2-kinase                                  | 3.03                                                               | -0.009                              | -0.006                              | -0.006                                 | -0.003                                  |
| Fructose-bisphosphate aldolase                            | 50.2                                                               | -0.015                              | -0.010                              | -0.008                                 | -0.004                                  |
| Phosphoglycerate kinase                                   | 1241.24                                                            | -0.030                              | -0.023                              | -0.023                                 | -0.016                                  |
| Photosynthesis rate                                       |                                                                    | 24.876                              | 29.176                              | 29.047                                 | 29.261                                  |

759 \* Assuming the total nitrogen (protein) resource is a constant

760 Table 2. The  $V_{cmax}$  and  $J_{max}$  of the predicted ACi curves. The  $V_{cmax}$  and  $J_{max}$  were predicted using  
761 A/Ci curve fitting utility version 2.0 (Sharkey, 2015).

| <b>Treatment</b>     | <b><math>V_{cmax}(25^{\circ}\text{C})</math></b> | <b><math>J_{max}(25^{\circ}\text{C})</math></b> |
|----------------------|--------------------------------------------------|-------------------------------------------------|
| <b>WT-Amb</b>        | 115.49                                           | 149.22                                          |
| <b>WT-Ele</b>        | 109.17                                           | 152.57                                          |
| <b>WT-Ele (ConN)</b> | 112.29                                           | 153.58                                          |

|                                     |        |        |
|-------------------------------------|--------|--------|
| <b>bHLH TFOx-Amb</b>                | 12.97  | 33.55  |
| <b>bHLH TFOx-Ele</b>                | 110.66 | 90.71  |
| <b>bHLH TFKo-Amb</b>                | 116.43 | 153.05 |
| <b>bHLH TFKo-Ele</b>                | 114.54 | 154.51 |
| <b>GmWRKY71Ox-Amb</b>               | 115.12 | 153.5  |
| <b>GmWRKY71Ox-Ele</b>               | 112.08 | 154.97 |
| <b>GmWRKY71Ko-Amb</b>               | 116.02 | 142.86 |
| <b>GmWRKY71Ko-Ele</b>               | 113.37 | 151.82 |
| <b>bHLH TFKo&amp;GmWRKY71Ox-Amb</b> | 118.93 | 154.76 |
| <b>bHLH TFKo&amp;GmWRKY71Ox-Ele</b> | 114.67 | 155.78 |
| <b>GmGATA2Ox-Amb</b>                | 91.28  | 157.58 |
| <b>GmGATA2Ox-Ele</b>                | 89.67  | 157.59 |
| <b>GmGATA2Ko-Amb</b>                | 123.28 | 135.62 |
| <b>GmGATA2Ko-Ele</b>                | 119.75 | 147.49 |

762 ConN: Assuming the total nitrogen (protein) resource is a constant

763

## 764 **FIGURE LEGENDS**

765 Figure 1. Simulated and measured (Bernacchi et al., 2005) photosynthetic carbon dioxide  
766 response curves of soybean growing in ambient CO<sub>2</sub> (370 μmol mol<sup>-1</sup>) and elevated CO<sub>2</sub> (550  
767 μmol mol<sup>-1</sup>). PAR is 2000 μmol m<sup>-2</sup> s<sup>-1</sup>

768

769 Figure 2. Model integration schematic describing the scaling from the gene regulatory network  
770 model to the metabolic model to the leaf physiological model. Note that these models interact  
771 through state variable indicated in the arrows. Ca is ambient CO<sub>2</sub> concentration, PPFD is the  
772 amount of light absorbed by the leaf, T is leaf temperature and A is the net carbon assimilation.

773

774 Figure 3. Metabolic model predicted metabolite concentrations without and with gene expression  
775 data (GE). PAR is 1200 μmol m<sup>-2</sup> s<sup>-1</sup>.

776

777 Figure 4. Gene expression level changes in target genes of interest as a result of *in silico*  
778 perturbation of three candidate TFs from the photosynthesis GRN. Figure shows mRNA  
779 expression levels in wild type and perturbed TF (bHLH TF knockout in a, GmWRKY71  
780 overexpression in b, simultaneous knockout of bHLH TF and GmWRKY71 overexpression in c,  
781 GmGATA overexpression in d) conditions under ambient and elevated CO<sub>2</sub>.

782

783 Figure 5. Gene regulatory network of metabolic genes having control coefficient  $> 0.01$  based on  
784 sensitivity analysis of the metabolic model enzymes after incorporating gene expression data.  
785 Figure shows transcription factors as triangles and metabolic genes as squares. The network also  
786 shows change in mRNA expression of these genes under elevated  $\text{CO}_2$  concentration in leaves  
787 with blue nodes indicating downregulation and orange nodes indicating upregulation under  
788 elevated  $\text{CO}_2$  as compared to ambient  $\text{CO}_2$ . Similarly, blue edges indicate predicted repression  
789 and orange edges indicate predicted activation of the metabolic gene by the TF. Thickness of the  
790 edges are based on linear model weights with more thickness indicating a heavier weight  
791 associated with the TF-target interaction.

792 Figure 6. Predicted influence of transcription factor perturbations on photosynthesis rate a)  
793 bHLHB TF Knockout; b) GmWRKY71 Overexpression; c) bHLH TF Ko + GmWRKY71 Ox; d)  
794 GmGATA2 Overexpression.

795

## 796 **SUPPLEMENTARY TABLES AND FIGURES**

797 Supplemental figure 1. Simulated variation of assimilation (a), transpiration (b), stomatal  
798 conductance (c), and leaf temperature (d) as a function of leaf internal  $\text{CO}_2$  concentration under  
799 ambient  $\text{CO}_2$  (black) and elevated  $\text{CO}_2$  (red). PPFD is  $1200 \mu\text{mol m}^{-2} \text{s}^{-1}$

800 Supplemental figure 2. Sub-networks for three transcription factors from the dynamic  
801 photosynthesis GRN chosen for *in silico* perturbation. The figure consists of bHLH TF (a),  
802 GmGATA2 (b) and GmWRKY71 (b) along with their predicted direct targets. Network nodes  
803 and interactions can be interpreted as in figure 5 of the main text.

804 Supplemental table 1. Least squares optimized weights for transcription factors regulating  
805 enzymes with high control coefficient after integration of protein translation model with e-  
806 photosynthesis metabolic model in the dynamic photosynthesis GRN. This table is provided  
807 separately as an excel workbook.

808 Supplemental table 2. Gene specific 'd' parameter values used in the protein translation model

809 Supplemental table 3.  $V_{\text{max}}$ ,  $K_{\text{cat}}$ , molecular weight and protein content used in the e-  
810 photosynthesis metabolic model

811 Supplemental table 4. Leaf level photosynthesis model parameters

812 Supplemental table 5. Steady state protein concentration ratios predicted by the protein  
813 translation model for enzymes that are part of the e-photosynthesis model

814

815 **Appendix 1 Abbreviations and units – Some variables have been added here**

816 *A*: Net carbon assimilation ( $\mu\text{mol m}^{-2} \text{s}^{-1}$ )

817 *A<sub>sat</sub>*: Light saturated *A* ( $\mu\text{mol m}^{-2} \text{s}^{-1}$ )

818 *C<sub>i</sub>*: Leaf intercellular CO<sub>2</sub> concentration ( $\mu\text{mol mol}^{-1}$ )

819 [CO<sub>2</sub>]: Atmospheric CO<sub>2</sub> concentration ( $\mu\text{mol mol}^{-1}$ )

820 FACE: Free Air [CO<sub>2</sub>] Enrichment

821 *g<sub>s</sub>*: Stomatal conductance ( $\text{mmol m}^{-2} \text{s}^{-1}$ )

822 *J*: Rate of electron transport ( $\mu\text{mol m}^{-2} \text{s}^{-1}$ )

823 *J<sub>max</sub>*: Maximum rate of electron transport ( $\mu\text{mol m}^{-2} \text{s}^{-1}$ )

824 *R<sub>d</sub>*: Mitochondrial respiration ( $\mu\text{mol m}^{-2} \text{s}^{-1}$ )

825 Rubisco: Ribulose-1,5-bisphosphate carboxylase/oxygenase

826 RubP: Ribulose-1,5-bisphosphate

827 SoyFACE: Soybean Free Air [CO<sub>2</sub>] Enrichment

828 *T<sub>leaf</sub>*: Leaf temperature (°C)

829 *V<sub>c,max</sub>*: Maximum velocity of carboxylation ( $\mu\text{mol m}^{-2} \text{s}^{-1}$ )

830

831

832

833

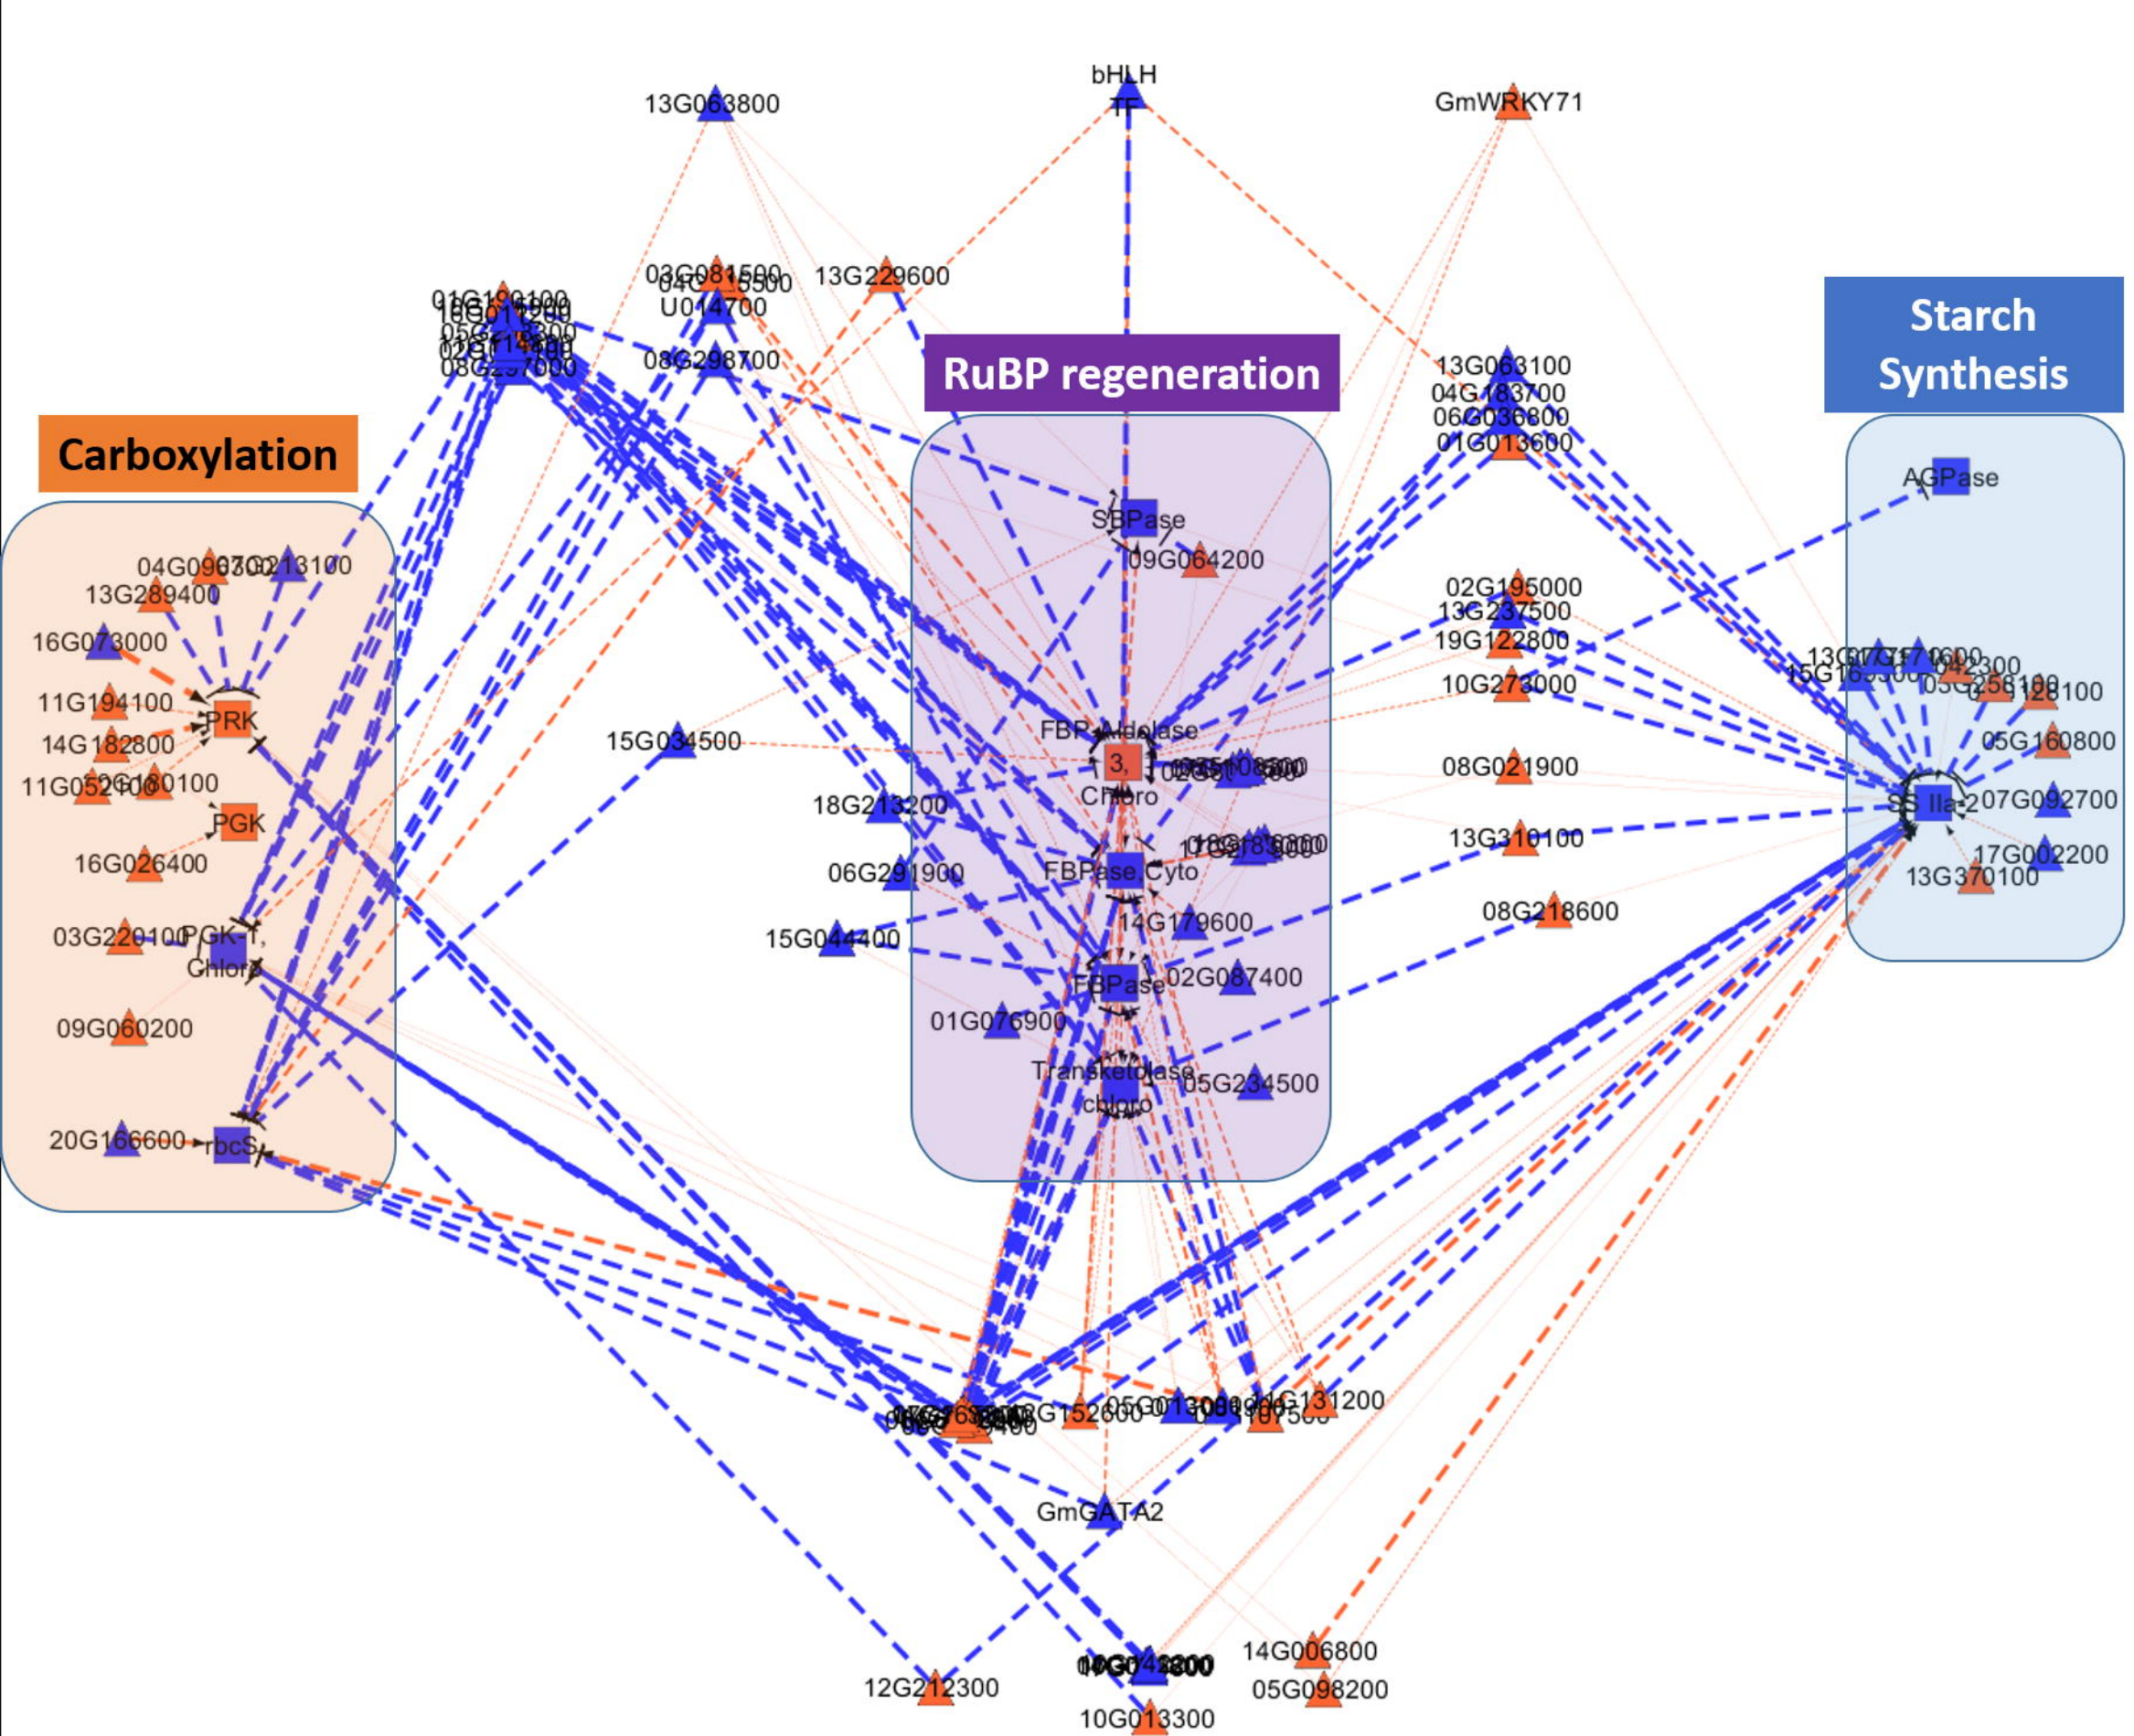

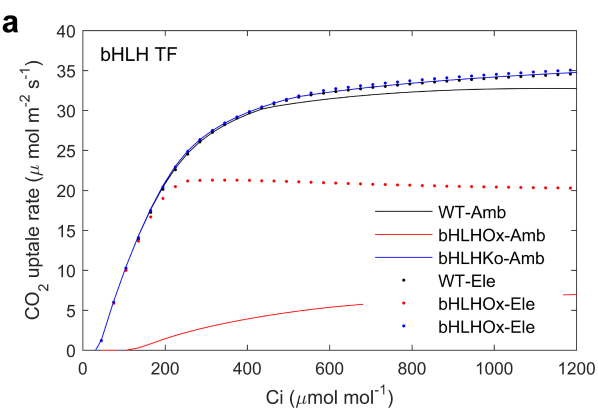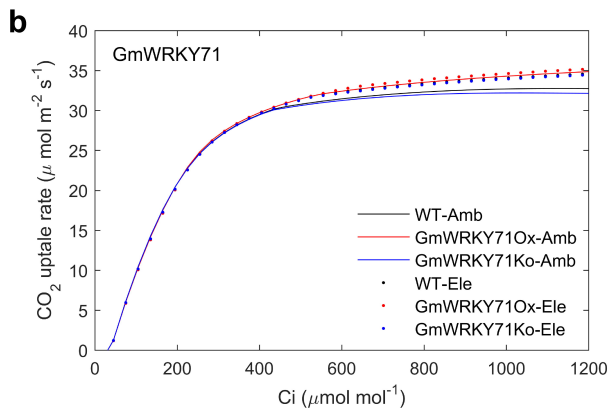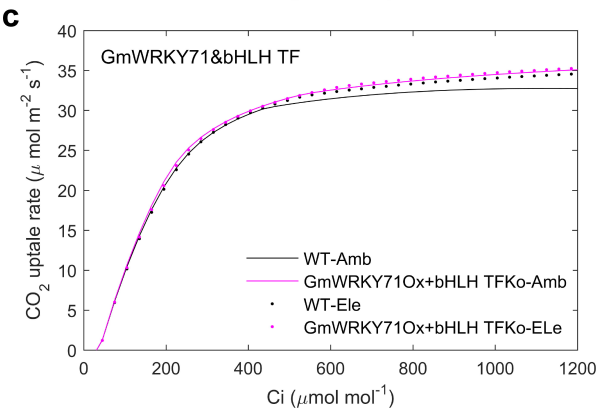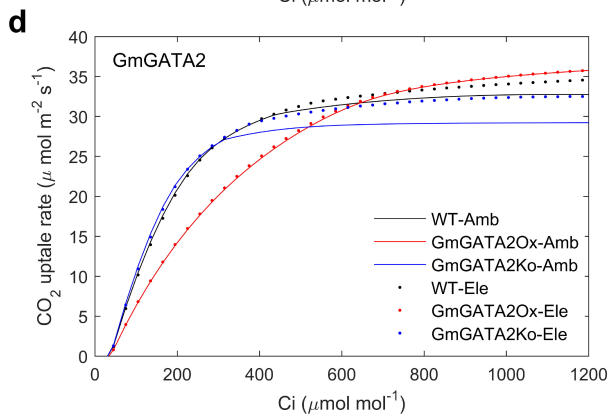

**a**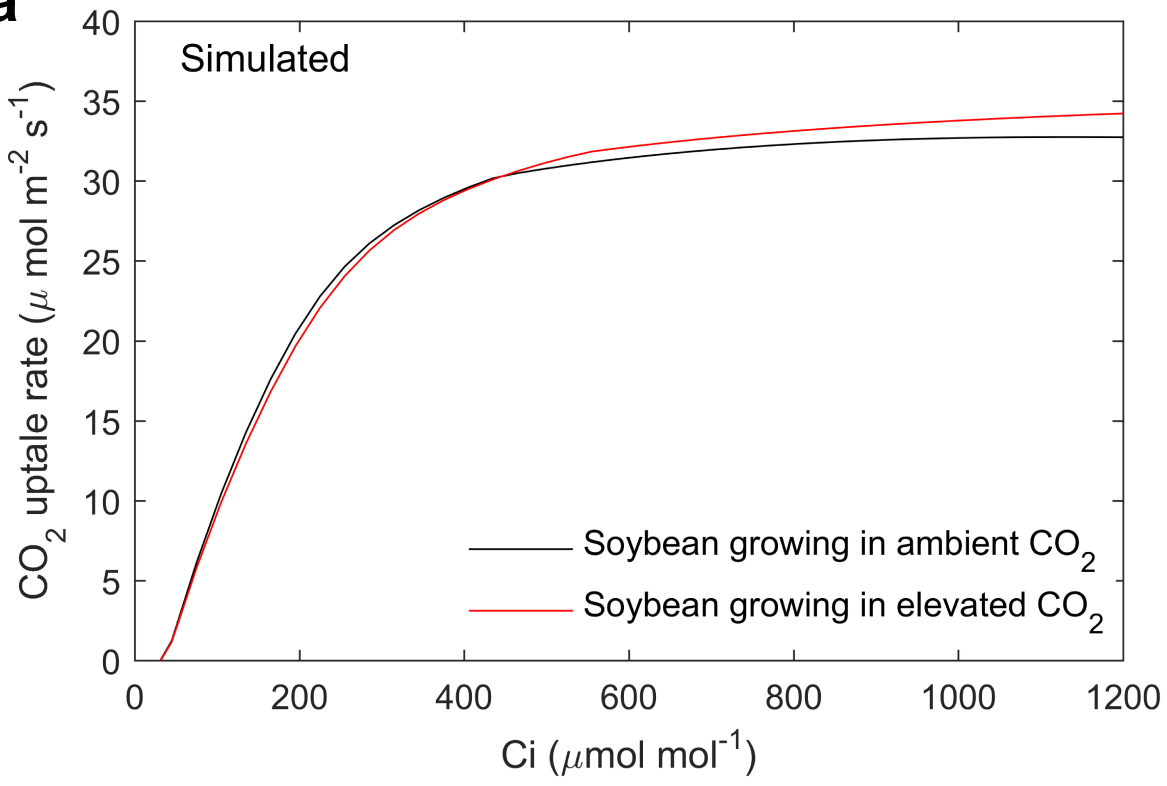**b**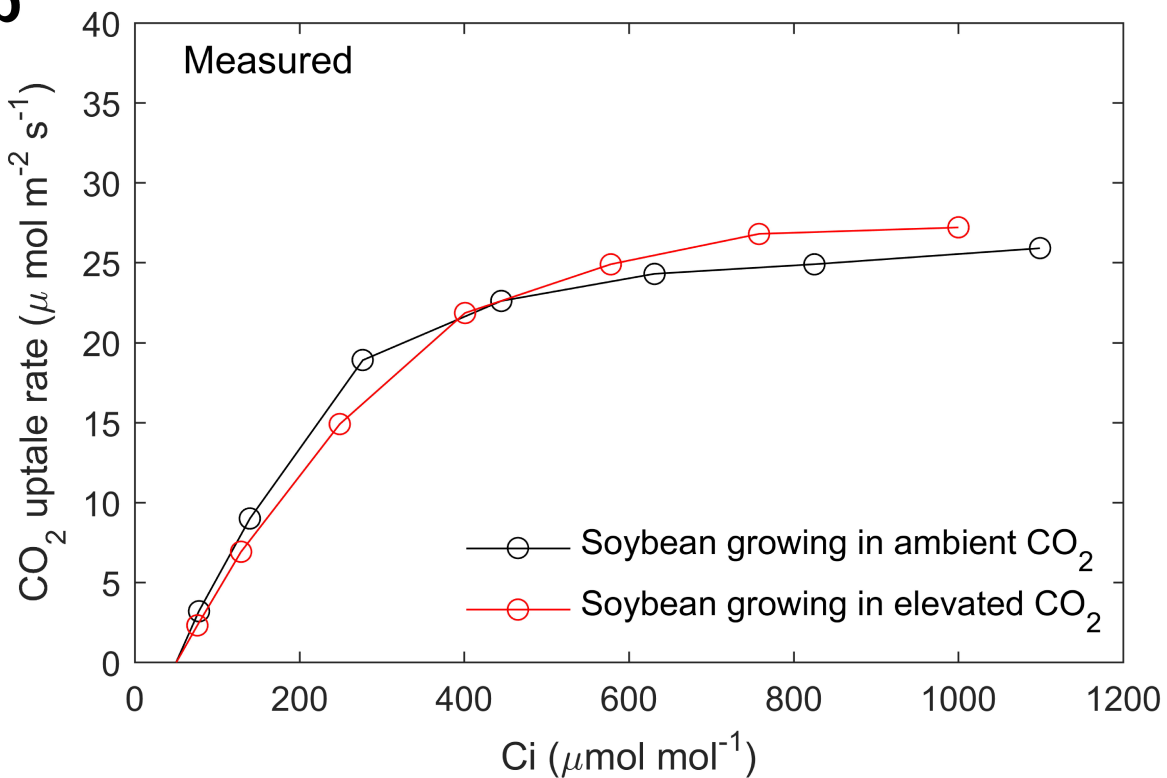



**a**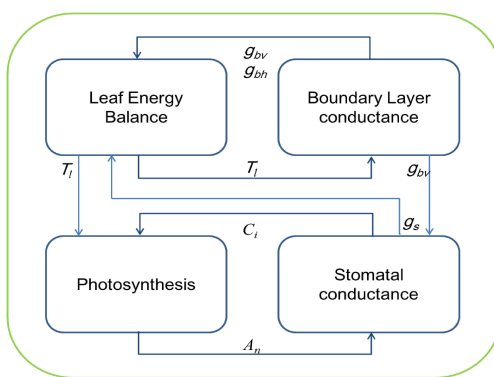

Photosynthesis rate

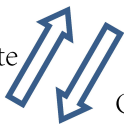CO<sub>2</sub> concentration, light, temperatureCO<sub>2</sub> concentration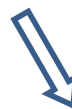**c**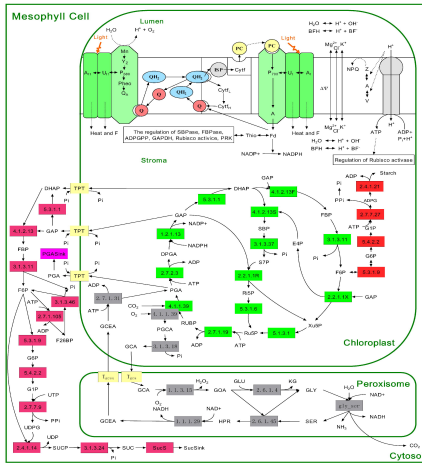**b**Protein concentration  
of enzymes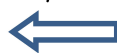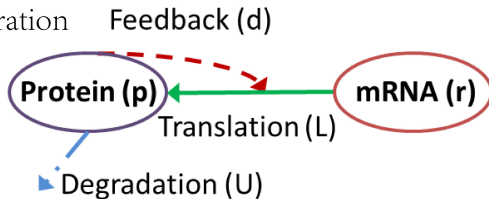

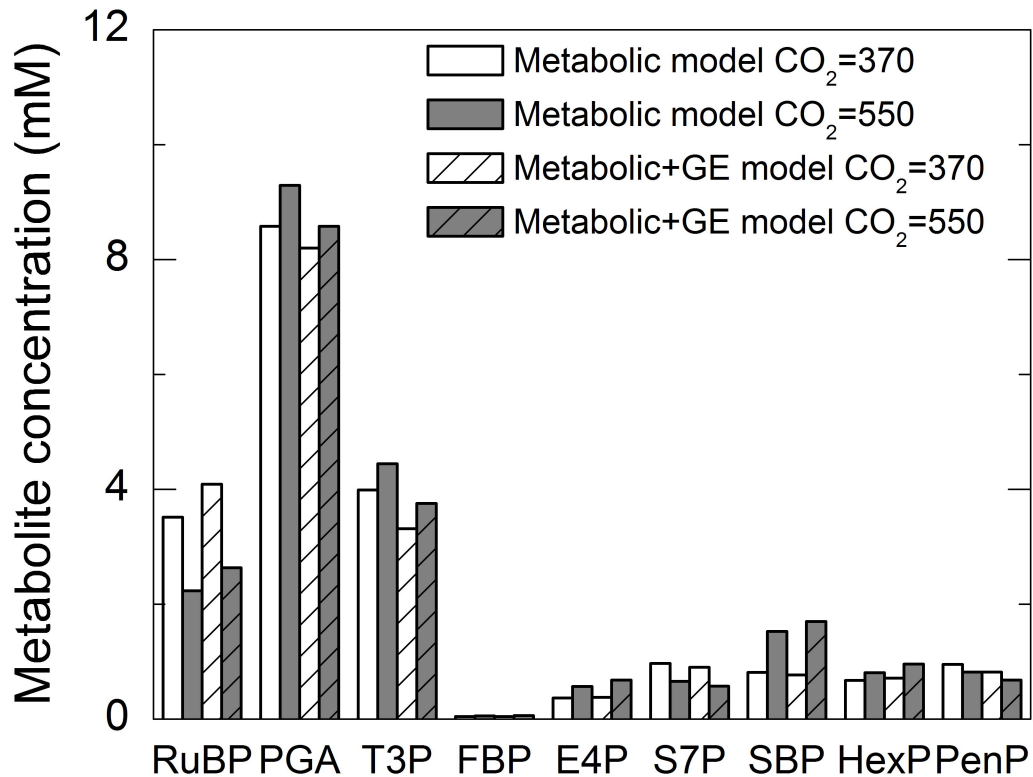

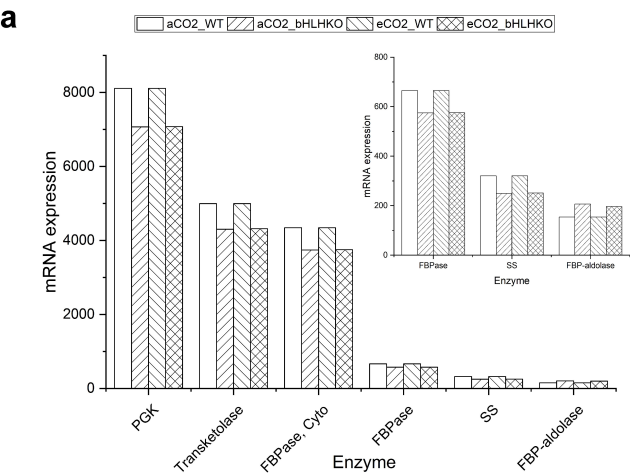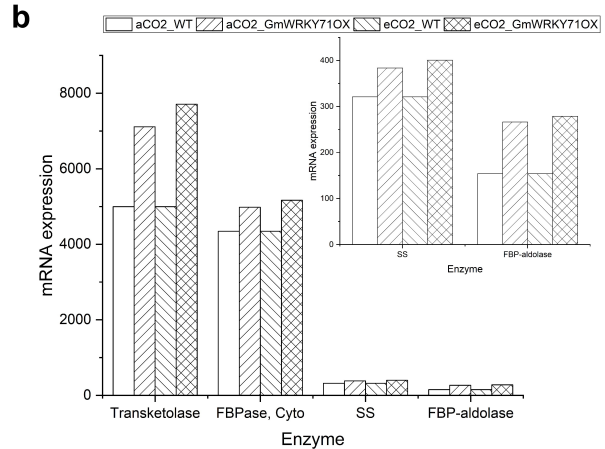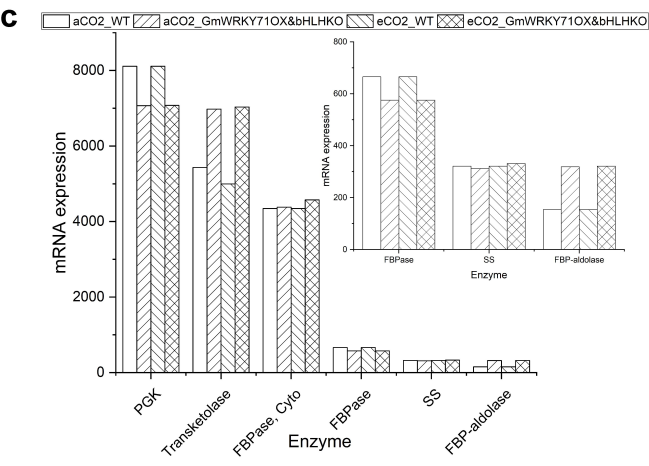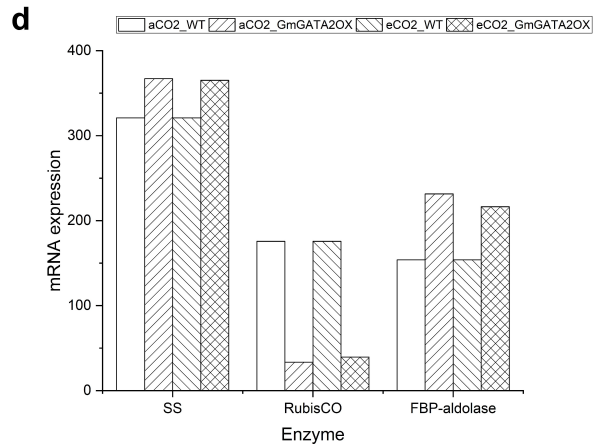

Source: https://biorxiv.org/content/biorxiv/early/2019/03/20/582981.full-text.pdf
